# Supplementary material for: Brucella abortus in Kazakhstan, population structure and comparison with worldwide genetic diversity
Source: Front Microbiol. 2023 Mar 22;14:1106994. doi: 10.3389/fmicb.2023.1106994 (PMC10073595; doi:10.3389/fmicb.2023.1106994)
Supplement: Supplementary file 6 [file Table_2.XLSX]

## Sheet: Table S2 Shevtsov2023
accession	species_inferred	exclusion_list or comment	Figure1	Figure3	Figure5	BEAST_429abomeli
SRR21979378	B. abortus clade C1	pruned B-abortus-Kaz99	X	X
SRR21979380	B. abortus clade C1	pruned 2SNPs B-abortus-a-14	X	X
SRR21979388	B. abortus clade C1		X	X	X	X
SRR21979391	B. abortus clade C1	pruned 1SNP B-abortus-a-14	X	X
SRR21979390	B. abortus clade C1	redundant B-abortus-a-14	X	X
SRR21979386	B. abortus clade C1	redundant B-abortus-a-14	X	X
SRR21979387	B. abortus clade C1	redundant B-abortus-a-17	X	X
SRR21979385	B. abortus clade C1	pruned 1SNP B-abortus-a-14	X	X
SRR21979384	B. abortus clade C1	redundant B-abortus-a-74	X	X
SRR21979379	B. abortus clade C1		X	X	X	X
SRR21979381	B. abortus clade C2	104M vaccine group
SRR21979394	B. abortus clade C2	104M vaccine group
SRR21979359	B. abortus clade C1		X	X	X	X
SRR21979401	B. abortus clade C1	pruned B-abortus-B0121	X	X
SRR21979399	B. abortus clade C1		X	X	X	X
SRR21979400	B. abortus clade C2	S19 vaccine group
SRR21979392	B. abortus clade C1		X	X	X	X
SRR21979404	B. abortus clade C1		X	X	X	X
SRR21979356	B. abortus clade C1	pruned 1SNPs GCA_016484075	X	X
SRR21979397	B. abortus clade C1		X	X	X	X
SRR21979370	B. abortus clade C1	pruned 1SNP B-abortus-Kaz051	X	X
SRR21979396	B. abortus clade C1		X	X	X	X
SRR21979360	B. abortus clade C1	pruned 1SNP B-abortus-Kaz051	X	X
SRR21979357	B. abortus clade C1	redundant B-abortus-Kaz051	X	X
SRR21979402	B. abortus clade C1		X	X	X	X
SRR21979389	B. abortus clade C1	redundant B-abortus-a-14	X	X
SRR21979393	B. abortus clade C1	redundant B-abortus-a-74	X	X
SRR21979383	B. abortus clade C1	redundant B. abortus 1247	X	X
SRR21979382	B. abortus clade C1	redundant B-abortus-a-74	X	X
SRR21979358	B. abortus clade C1		X	X	X	X
SRR21979403	B. abortus clade C1	redundant B-abortus-Kaz051	X	X
SRR21979398	B. abortus clade C1		X	X	X	X
SRR21979373	B. abortus clade C1		X	X	X	X
SRR21979367	B. abortus clade C1	pruned 3SNPs Kaz092	X	X
SRR21979372	B. abortus clade C1		X	X	X	X
SRR21979361	B. abortus clade C1		X	X	X	X
SRR21979362	B. abortus clade C1		X	X	X	X
SRR21979365	B. abortus clade C1		X	X	X	X
SRR21979377	B. abortus clade C1	pruned B-abortus-Kaz52	X	X
SRR21979395	B. abortus clade C1	redundant B-abortus-Kaz051	X	X
SRR21979376	B. abortus clade C1	pruned B-abortus-Kaz52	X	X
SRR21979375	B. abortus clade C1		X	X	X	X
SRR21979374	B. abortus clade C1	redundant B-abortus-Kaz52	X	X
SRR21979371	B. abortus clade C1		X	X	X	X
SRR21979363	B. abortus clade C1		X	X	X	X
SRR21979364	B. abortus clade C1		X	X	X	X
SRR21979369	B. abortus clade C1		X	X	X	X
SRR21979368	B. abortus clade C1	redundant B-abortus-Kaz86	X	X
SRR21979366	B. abortus clade C1		X	X	X	X
SRR22388585	B. abortus clade C2
SRR22388591	B. abortus clade C2
SRR22388587	B. abortus clade B				X	X
SRR22388593	B. abortus clade C1	duplicate
SRR22388604	B. abortus clade B				X	X
SRR22388605	B. abortus clade B				X	X
SRR22388606	B. abortus clade B				X	X
SRR22388607	B. abortus clade B				X	X
SRR22388608	B. abortus clade B				X	X
SRR22388599	B. abortus clade C1			X	X	X
SRR22388575	B. abortus clade B				X	X
SRR22388576	B. abortus clade B				X	X
SRR22388577	B. abortus clade B				X	X
SRR22388578	B. abortus clade B				X	X
SRR22388600	B. abortus clade C1			X	X	X
SRR22388602	B. abortus clade B				X	X
SRR22388579	B. abortus clade B				X	X
SRR22388598	B. abortus clade B				X	X
SRR22388589	B. abortus clade C2				X	X
SRR22388580	B. abortus clade B				X	X
SRR22388586	B. abortus clade C2
SRR22388597	B. abortus clade C1			X	X	X
SRR22388592	B. abortus clade C2				X	X
SRR22388609	B. abortus clade B				X	X
SRR22388610	B. abortus clade B
SRR22388590	B. abortus clade C2				X	X
SRR22388603	B. abortus clade B				X	X
SRR22388588	B. abortus clade C2				X	X
SRR22388584	B. abortus clade C2				X	X
SRR22388583	B. abortus clade C2				X	X
SRR22388594	B. abortus clade C1			X	X	X
SRR22388595	B. abortus clade C1	duplicate
SRR22388596	B. abortus clade C1			X	X	X
SRR22388582	B. abortus clade C2	duplicate
SRR22388601	B. abortus clade C1	duplicate
SRR22388581	B. abortus clade C2	duplicate
ERR2192790	B. melitensis African					X
ERR2192791	B. melitensis East Mediterranean					X
ERR2192793	B. melitensis East Mediterranean	pruned 9SNPs SRR4436618				X
ERR2192797	B. melitensis African					X
ERR2192798	B. melitensis East Mediterranean	duplicate
ERR2192799	B. melitensis Americas	duplicate
ERR2192800	B. melitensis East Mediterranean					X
ERR2192802	B. melitensis East Mediterranean					X
ERR2192803	B. melitensis African					X
ERR2192804	B. melitensis East Mediterranean	pruned 14SNPs SRR4436619				X
ERR2192805	B. melitensis	redundant
ERR2192807	B. melitensis East Mediterranean	pruned 14SNPs SRR11178075				X
ERR2192808	B. melitensis East Mediterranean					X
ERR2192809	B. melitensis East Mediterranean	pruned 12SNPs SRR4436607				X
ERR2192810	B. melitensis East Mediterranean					X
ERR2192811	B. melitensis African					X
ERR2192812	B. melitensis	redundant
ERR2192813	B. melitensis East Mediterranean	pruned 9SNPs SRR4436594				X
ERR2938642	B. melitensis East Mediterranean	cover issue pruned 5SNPs ERR2938683
ERR2938643	B. melitensis Americas
ERR2938644	B. melitensis Americas
ERR2938645	B. melitensis East Mediterranean	redundant ERR2938689
ERR2938646	B. melitensis East Mediterranean	redundant ERR2938690
ERR2938647	B. melitensis Americas
ERR2938648	B. melitensis Americas
ERR2938649	B. melitensis East Mediterranean
ERR2938651	B. melitensis East Mediterranean
ERR2938652	B. melitensis East Mediterranean	pruned 11SNPs ERR2938661
ERR2938653	B. melitensis East Mediterranean
ERR2938654	B. melitensis East Mediterranean	pruned 5SNPs BCCN#01-19
ERR2938656	B. melitensis East Mediterranean	pruned 2SNPs ERR2938651
ERR2938657	B. melitensis East Mediterranean	pruned 8SNPs BCCN#90-183
ERR2938658	B. melitensis East Mediterranean	pruned 1SNPs ERR2938651
ERR2938659	B. melitensis East Mediterranean	redundant ERR2938706
ERR2938661	B. melitensis East Mediterranean
ERR2938663	B. melitensis East Mediterranean	pruned 1SNP ERR2938676
ERR2938664	B. melitensis East Mediterranean	pruned 1SNPs ERR2938651
ERR2938665	B. melitensis African
ERR2938666	B. abortus clade C1	pruned 4SNPs SRR642182
ERR2938667	B. melitensis East Mediterranean	redundant ERR2938706
ERR2938670	B. melitensis Americas
ERR2938671	B. melitensis East Mediterranean	pruned 10SNPs BCCN#90-183
ERR2938672	B. melitensis East Mediterranean	pruned 9SNPs ERR2938699
ERR2938674	B. melitensis Americas
ERR2938676	B. melitensis East Mediterranean
ERR2938677	B. melitensis East Mediterranean
ERR2938678	B. abortus clade C2	2308 derived
ERR2938679	B. melitensis East Mediterranean
ERR2938680	B. melitensis East Mediterranean	pruned 5SNPs BCCN#00-21
ERR2938681	B. melitensis Americas
ERR2938682	B. melitensis East Mediterranean	redundant ERR2938690
ERR2938683	B. melitensis East Mediterranean
ERR2938684	B. melitensis Americas
ERR2938685	B. melitensis Americas
ERR2938686	B. abortus clade C2	pruned 1SNP S19
ERR2938688	B. melitensis East Mediterranean
ERR2938689	B. melitensis East Mediterranean
ERR2938690	B. melitensis East Mediterranean	pruned 2SNPs ERR2938651
ERR2938691	B. melitensis East Mediterranean	pruned 10SNPs BCCN#90-183
ERR2938692	B. melitensis East Mediterranean	pruned 12SNPs BCCN#90-183
ERR2938693	B. melitensis Americas
ERR2938694	B. melitensis East Mediterranean	cover issue pruned 13SNPs BCCN#90-183
ERR2938696	B. melitensis East Mediterranean	redundant ERR2938706
ERR2938698	B. melitensis Americas
ERR2938699	B. melitensis East Mediterranean
ERR2938700	B. melitensis East Mediterranean	pruned 1SNP ERR2938676
ERR2938702	B. melitensis East Mediterranean	redundant ERR2938656
ERR2938703	B. melitensis East Mediterranean	pruned 2SNPs BCCN#00-4
ERR2938704	B. melitensis East Mediterranean
ERR2938705	B. melitensis East Mediterranean	redundant ERR2938706
ERR2938706	B. melitensis East Mediterranean	pruned 8SNPs ERR2938653
ERR2993131	B. melitensis East Mediterranean	redundant SRR4436576
ERR2993132	B. melitensis East Mediterranean	redundant SRR4436583
ERR2993133	B. melitensis East Mediterranean	redundant SRR4436577
ERR2993135	B. melitensis East Mediterranean	redundant SRR4436582
ERR2993136	B. melitensis East Mediterranean	redundant SRR4436616
ERR2993137	B. melitensis East Mediterranean	redundant SRR4436603
ERR2993139	B. melitensis East Mediterranean	redundant SRR4436625
ERR2993141	B. melitensis East Mediterranean	redundant SRR4436622
ERR2993142	B. melitensis East Mediterranean	redundant SRR4436575
ERR2993143	B. melitensis East Mediterranean	redundant SRR4436629
ERR2993144	B. melitensis East Mediterranean	redundant SRR4436624
ERR2993146	B. melitensis East Mediterranean	redundant SRR4436581
ERR2993147	B. melitensis East Mediterranean	redundant SRR4436615
ERR2993148	B. melitensis East Mediterranean	redundant SRR4436631
ERR2993149	B. melitensis East Mediterranean	redundant SRR4436614
ERR2993150	B. melitensis East Mediterranean	redundant SRR4436627
ERR2993151	B. melitensis East Mediterranean	redundant SRR4436594
ERR2993152	B. abortus clade C2	pruned 6SNPs 544
ERR2993153	B. melitensis East Mediterranean	redundant SRR4436626
ERR2993154	B. melitensis East Mediterranean	redundant SRR4436612
ERR2993156	B. melitensis East Mediterranean	redundant SRR4436620
ERR2993157	B. melitensis East Mediterranean	redundant SRR4436571
ERR2993158	B. melitensis East Mediterranean	redundant SRR4436605
ERR2993159	B. melitensis East Mediterranean	redundant SRR4436578
ERR2993160	B. melitensis East Mediterranean	redundant SRR4436584
ERR2993161	B. melitensis East Mediterranean	redundant SRR4436613
ERR2993162	B. melitensis East Mediterranean	redundant SRR4436623
ERR2993163	B. melitensis East Mediterranean	redundant SRR4436599
ERR3454412	B. abortus clade C2				X	X
ERR3454413	B. abortus clade C2
ERR3454414	B. abortus clade C2				X	X
ERR3454415	B. abortus clade C2
ERR3454416	B. abortus clade C2				X	X
ERR3454417	B. abortus clade C2				X	X
ERR3454418	B. abortus clade C2
ERR3454419	B. abortus clade C2
ERR3454420	B. abortus clade C2				X	X
ERR3454421	B. abortus clade C2
ERR3454422	B. abortus clade C2				X	X
ERR3454423	B. abortus clade C2				X	X
ERR3454424	B. abortus clade C2				X	X
ERR3454425	B. abortus clade C2	redundant baboCR79B
ERR3454426	B. abortus clade C2
ERR3454427	B. abortus clade C2
ERR3454428	B. abortus clade C2				X	X
ERR3454429	B. abortus clade C2				X	X
ERR3454430	B. abortus clade C2				X	X
ERR3454431	B. abortus clade C2
ERR3454432	B. abortus clade C2
ERR3454433	B. abortus clade C2				X	X
ERR3454434	B. abortus clade C2
ERR3454435	B. abortus clade C2	redundant babohCR177
ERR3454436	B. abortus clade C2
ERR3454437	B. abortus clade C2	redundant babohCR177
ERR3454438	B. abortus clade C2
ERR3454439	B. abortus clade C2	redundant babohCR196
ERR3454440	B. abortus clade C2
ERR4074327	B. melitensis West Mediterranean	redundant 18-BR00149-2
ERR4074328	B. melitensis West Mediterranean
ERR4074329	B. melitensis West Mediterranean	redundant 18-BR00149-2
ERR418020	B. abortus clade C2	cluster baboCR32
ERR418021	B. abortus clade C2	cluster baboCR32
ERR418022	B. abortus clade C2	cluster baboCR32
ERR467402	B. abortus clade C2
ERR4708859	B. abortus clade A	cropped 5SNPs ERR4708862
ERR4708860	B. abortus clade A	cropped 5SNPs ERR4708862
ERR4708861	B. abortus clade A	redundant ERR4708859
ERR4708862	B. abortus clade A				X	X
ERR4708863	B. abortus clade A	cropped 5SNPs ERR4708862
ERR4708864	B. abortus clade A	redundant ERR4708872
ERR4708865	B. abortus clade A	redundant ERR4708865
ERR4708866	B. abortus clade A	redundant ERR4708872
ERR4708867	B. abortus clade A	redundant ERR4708862
ERR4708868	B. abortus clade A	redundant ERR4708865
ERR4708869	B. abortus clade A	redundant ERR4708865
ERR4708870	B. abortus clade A	cropped 5SNPs ERR4708862
ERR4708871	B. abortus clade A	cropped 5SNPs ERR4708862
ERR4708872	B. abortus clade A	cropped 5SNPs ERR4708862
ERR4708873	B. abortus clade A	redundant ERR4708860
ERR4708874	B. melitensis African
ERR4708875	B. melitensis African
ERR471314	B. abortus clade C2	redundant
ERR471315	B. abortus clade C2	redundant, potentially derived from 2308
ERR471334	B. abortus clade C2
ERR471335	B. abortus clade C2
ERR471336	B. abortus clade C2	redundant baboCR49
ERR471338	B. abortus clade C2
ERR471339	B. abortus clade C2	redundant
ERR471340	B. abortus clade C2	redundant
ERR471341	B. abortus clade C2	redundant
ERR471342	B. abortus clade C2	redundant
ERR471343	B. abortus clade C2	cluster baboCR32
ERR471344	B. abortus clade C2	cluster baboCR32
ERR471345	B. abortus clade C2	cluster baboCR32
ERR471346	B. abortus clade C2	redundant
ERR471347	B. abortus clade C2	redundant
ERR471348	B. abortus clade C2	redundant
ERR471349	B. abortus clade C2	redundant
ERR471350	B. abortus clade C2	cluster baboCR32
ERR471351	B. abortus clade C2	cluster baboCR32
ERR471352	B. abortus clade C2	redundant
ERR471353	B. abortus clade C2	redundant
ERR471354	B. abortus clade C2	redundant
ERR471355	B. abortus clade C2	cluster baboCR49
ERR471356	B. abortus clade C2	redundant
ERR471357	B. abortus clade C2	redundant
ERR471358	B. abortus clade C2	redundant
ERR471359	B. abortus clade C2	cluster baboCR32
ERR471360	B. abortus clade C2	cluster baboCR32
ERR471361	B. abortus clade C2	redundant
ERR471362	B. abortus clade C2	cluster baboCR32
ERR471363	B. abortus clade C2	redundant
ERR471364	B. abortus clade C2	redundant
ERR471365	B. abortus clade C2	redundant
ERR471366	B. abortus clade C2	redundant
ERR471367	B. abortus clade C2	cluster baboCR32
ERR471368	B. abortus clade C2	cluster baboCR32
ERR471369	B. abortus clade C2	cluster baboCR32
ERR471370	B. abortus clade C2
ERR471371	B. abortus clade C2	cluster baboCR49
ERR472949	B. melitensis West Mediterranean					X
ERR473730	B. abortus clade C2	redundant
ERR473731	B. abortus clade C2	redundant
ERR473732	B. abortus clade C2	redundant
ERR473733	B. abortus clade C2	redundant
ERR473734	B. abortus clade C2	cluster baboCR49
ERR473735	B. abortus clade C2	redundant
ERR473736	B. abortus clade C2	cluster baboCR49
ERR473737	B. abortus clade C2	redundant
ERR473738	B. abortus clade C2	redundant
ERR473739	B. abortus clade C2	redundant
ERR473740	B. abortus clade C2	redundant
ERR473741	B. abortus clade C2	cluster baboCR32
ERR473744	B. abortus clade C2
ERR473745	B. abortus clade C2	redundant, potentially derived from 2308
ERR485952	B. abortus clade C2	cluster baboCR49
ERR485953	B. abortus clade C2
ERR485954	B. abortus clade C2	redundant
ERR554814	B. abortus clade C2	redundant, derived from RB51
ERR554815	B. abortus clade C2	redundant, derived from RB51
ERR554816	B. abortus clade C2
ERR554817	B. abortus clade C2
ERR554822	B. abortus clade B	redundant
ERR554823	B. abortus clade B
ERR554824	B. abortus clade B
ERR554825	B. abortus clade B
ERR554826	B. abortus clade C1	pruned 9SNPs SRR642184
ERR554827	B. abortus clade C1	slightly long branch
ERR554828	B. abortus clade C1	pruned 3SNPs SRR642184
ERR554830	B. abortus clade B
ERR554831	B. abortus clade B
ERR762403	B. abortus clade C2	redundant
ERR775234	B. abortus clade C2
ERR775235	B. abortus clade C2	redundant
ERR775240	B. abortus clade C2
ERR775241	B. abortus clade C2
ERR775243	B. abortus clade C2
ERR8027289	B. abortus clade C2				X	X
ERR8027290	B. melitensis East Mediterranean	pruned 13SNPs SRR4436613
ERR8027291	B. melitensis East Mediterranean
ERR8027292	B. melitensis East Mediterranean
ERR8027293	B. melitensis East Mediterranean
ERR8027294	B. melitensis Americas	located on branch to ADMAS-G1. Collapse?
ERR8027295	B. melitensis East Mediterranean
ERR8027296	B. melitensis East Mediterranean
ERR8027297	B. melitensis East Mediterranean	pruned 7SNPs SRR4436613
ERR8027298	B. melitensis East Mediterranean	pruned 10SNPs ERR8027301
ERR8027299	B. melitensis East Mediterranean
ERR8027300	B. melitensis Americas	rev1 derived
ERR8027301	B. melitensis East Mediterranean
ERR8027302	B. abortus clade C1			X	X	X
ERR8027303	B. melitensis East Mediterranean	pruned 2SNPs ERR8027299
ERR8027304	B. melitensis Americas	rev1 derived
ERR8027305	B. abortus clade C1			X	X	X
ERR8027306	B. melitensis East Mediterranean	pruned 10SNPs SRR9831909
ERR8027307	B. melitensis East Mediterranean	pruned 11SNPs SRR9831909
ERR8027308	B. melitensis East Mediterranean	redundant ERR8027312
ERR8027309	B. melitensis East Mediterranean
ERR8027310	B. melitensis East Mediterranean	pruned 12SNPs SRR9831909
ERR8027311	B. melitensis East Mediterranean	redundant ERR8027314
ERR8027312	B. melitensis East Mediterranean	pruned 3SNPs SRR4436602
ERR8027313	B. melitensis East Mediterranean	redundant ERR8027312
ERR8027314	B. melitensis East Mediterranean	pruned 12SNPs SRR4436613
ERR8027315	B. melitensis East Mediterranean	redundant ERR8027317
ERR8027316	B. melitensis East Mediterranean	redundant ERR8027317
ERR8027317	B. melitensis East Mediterranean
ERR8027318	B. melitensis East Mediterranean	redundant ERR8027317
ERR8027319	B. melitensis East Mediterranean	redundant ERR8027317
ERR8027320	B. melitensis East Mediterranean	redundant ERR8027321
ERR8027321	B. melitensis East Mediterranean
ERR8027322	B. melitensis Americas	redundant rev1
ERR8027323	B. melitensis East Mediterranean
ERR8027324	B. melitensis East Mediterranean	pruned 1SNP ERR8027323
ERR8027325	B. melitensis East Mediterranean
ERR8027326	B. melitensis East Mediterranean	redundant ERR8027327
ERR8027327	B. melitensis East Mediterranean
ERR8027328	B. melitensis Americas	rev1 derived
GCA_000007125	B. melitensis Americas	duplicate
GCA_000008145	B. abortus clade C2	redundant
GCA_000018725	B. abortus clade C2	duplicate
GCA_000022625	B. melitensis East Mediterranean	duplicate
GCA_000054005	B. abortus clade C2	duplicate
GCA_000157675	B. abortus clade C1	duplicate
GCA_000157695	B. abortus clade C2	duplicate
GCA_000157715	B. abortus clade B	duplicate
GCA_000157735	B. abortus clade C2	duplicate
GCA_000158695	B. melitensis Americas	duplicate
GCA_000158735	B. melitensis West Mediterranean	duplicate
GCA_000158795	B. abortus clade C1	duplicate
GCA_000160255	B. abortus clade C2	duplicate
GCA_000160295	B. melitensis Americas	duplicate
GCA_000163115	B. abortus clade C1	duplicate
GCA_000182235	B. melitensis East Mediterranean	duplicate
GCA_000182625	B. abortus clade C2	duplicate
GCA_000192725	B. melitensis East Mediterranean	pruned 7SNP SRR8255646				X
GCA_000192885	B. melitensis East Mediterranean	redundant, vaccine from M28
GCA_000209575	B. melitensis East Mediterranean	pruned 10SNPs SRR8255646
GCA_000209595	B. melitensis East Mediterranean	pruned 10SNPs SRR8255646
GCA_000209615	B. melitensis East Mediterranean	pruned 1SNP SRR8255646
GCA_000227645	B. melitensis East Mediterranean	topology pruned 21SNPs GCA_002263015 long terminal branch				X
GCA_000238175	B. abortus clade C2
GCA_000245835	B. abortus clade C2	duplicate
GCA_000245855	B. abortus clade C2	duplicate
GCA_000245875	B. abortus clade C2	duplicate
GCA_000245895	B. abortus clade C2	duplicate
GCA_000245915	B. abortus clade C2	duplicate
GCA_000245935	B. abortus clade C2	duplicate
GCA_000245955	B. abortus clade C2	duplicate
GCA_000245975	B. abortus clade C2	duplicate
GCA_000250795	B. melitensis East Mediterranean	duplicate
GCA_000250815	B. melitensis East Mediterranean	pruned 3SNP SRR8255646
GCA_000250835	B. abortus clade C2	104M vaccine group supposedly 16M derived 13 weeks mice
GCA_000292025	B. abortus clade C2	104M vaccine group
GCA_000292065	B. melitensis East Mediterranean	pruned 3SNPs GCA_002214285
GCA_000292085	B. melitensis East Mediterranean	redundant
GCA_000292125	B. melitensis Americas
GCA_000292165	B. melitensis East Mediterranean	pruned 3SNP SRR8255646
GCA_000298595	B. melitensis East Mediterranean	duplicate BCB033?
GCA_000298615	B. melitensis East Mediterranean	duplicate BCB028?
GCA_000298635	B. abortus clade C2	104M vaccine group
GCA_000331655	B. melitensis East Mediterranean	pruned GCA_023796775
GCA_000348645	B. melitensis East Mediterranean	duplicate M5
GCA_000365605	B. abortus clade C2
GCA_000365625	B. abortus clade C1	duplicate
GCA_000365645	B. abortus clade C2	duplicate
GCA_000365665	B. abortus clade C2	duplicate
GCA_000365685	B. abortus clade C2	duplicate
GCA_000365725	B. abortus clade C2	duplicate
GCA_000365745	B. abortus clade C2	duplicate
GCA_000365765	B. abortus clade B	duplicate
GCA_000365785	B. abortus clade C2	duplicate
GCA_000365805	B. abortus clade C2	duplicate
GCA_000365825	B. abortus clade C2	duplicate
GCA_000365845	B. melitensis West Mediterranean	duplicate
GCA_000365865	B. melitensis Americas	duplicate
GCA_000366025	B. abortus clade C2	duplicate derived from 2308
GCA_000366105	B. abortus clade B	duplicate
GCA_000366125	B. abortus clade C2	duplicate
GCA_000366145	B. abortus clade C2	duplicate
GCA_000366165	B. abortus clade C2	duplicate
GCA_000366185	B. abortus clade C2	redundant
GCA_000366285	B. abortus clade C1	duplicate
GCA_000366305	B. abortus clade C2	duplicate
GCA_000366325	B. abortus clade B	duplicate
GCA_000366345	B. abortus clade C1	duplicate
GCA_000366365	B. abortus clade C2	duplicate
GCA_000366385	B. abortus clade C1	duplicate
GCA_000366405	B. abortus clade C2	duplicate
GCA_000366425	B. abortus clade C2	duplicate
GCA_000366445	B. abortus clade C2	duplicate
GCA_000366465	B. abortus clade C2	duplicate
GCA_000366485	B. abortus clade C2				X	X
GCA_000366505	B. abortus clade C2	duplicate
GCA_000366525	B. abortus clade C2	duplicate
GCA_000366545	B. abortus clade C2	duplicate
GCA_000366565	B. abortus clade C2	duplicate
GCA_000366585	B. melitensis East Mediterranean	duplicate
GCA_000366605	B. abortus clade C2	duplicate
GCA_000366625	B. melitensis Americas	duplicate
GCA_000366645	B. abortus clade C2	duplicate
GCA_000366665	B. abortus clade C2	duplicate
GCA_000366685	B. abortus clade C2	duplicate
GCA_000366705	B. abortus clade C2	duplicate
GCA_000366725	B. abortus clade C2	duplicate
GCA_000366745	B. abortus clade C2	duplicate
GCA_000366765	B. abortus clade C2	duplicate
GCA_000366785	B. abortus clade C2	duplicate
GCA_000366805	B. abortus clade C2	duplicate
GCA_000366845	B. melitensis East Mediterranean	duplicate
GCA_000366865	B. melitensis East Mediterranean	duplicate
GCA_000366885	B. melitensis Americas	duplicate
GCA_000366905	B. melitensis Americas	redundant BCCN#96-137B
GCA_000366925	B. melitensis Americas	duplicate
GCA_000366945	B. melitensis East Mediterranean	duplicate
GCA_000366965	B. melitensis Americas	duplicate
GCA_000366985	B. melitensis West Mediterranean	duplicate
GCA_000367005	B. melitensis East Mediterranean	duplicate
GCA_000367025	B. melitensis West Mediterranean	duplicate
GCA_000367045	B. melitensis Americas	duplicate
GCA_000369905	B. abortus clade C2	duplicate
GCA_000369925	B. abortus clade C1	duplicate
GCA_000369945	B. abortus clade C2	duplicate
GCA_000369965	B. abortus clade C2	duplicate
GCA_000369985	B. abortus clade C1	duplicate
GCA_000370005	B. abortus clade C1	duplicate
GCA_000370025	B. abortus clade C1	duplicate
GCA_000370045	B. abortus clade C2	duplicate
GCA_000370065	B. abortus clade A	duplicate
GCA_000370085	B. abortus clade C2	duplicate
GCA_000370105	B. abortus clade C2	duplicate
GCA_000370125	B. abortus clade C1	duplicate
GCA_000370145	B. abortus clade C2	duplicate
GCA_000370165	B. abortus clade C1	duplicate
GCA_000370185	B. abortus clade B	duplicate
GCA_000370205	B. abortus clade B	duplicate
GCA_000370225	B. abortus clade B	duplicate
GCA_000370245	B. abortus clade B	duplicate
GCA_000370265	B. abortus clade C2	duplicate
GCA_000370285	B. abortus clade C1	duplicate
GCA_000370305	B. abortus clade B	duplicate
GCA_000370325	B. abortus clade C1	duplicate
GCA_000370345	B. abortus clade A	duplicate
GCA_000370365	B. abortus clade B	duplicate
GCA_000370385	B. abortus clade C2	duplicate
GCA_000370405	B. abortus clade C1	duplicate
GCA_000370425	B. abortus clade C1	duplicate
GCA_000370445	B. abortus clade B	redundant
GCA_000370465	B. abortus clade B	duplicate
GCA_000370485	B. abortus clade B	duplicate
GCA_000370505	B. abortus clade C2	duplicate
GCA_000370525	B. abortus clade C2	duplicate
GCA_000370545	B. abortus clade C2	duplicate
GCA_000370565	B. abortus clade C1	duplicate
GCA_000370625	B. melitensis East Mediterranean	duplicate
GCA_000370645	B. melitensis Americas	duplicate
GCA_000370665	B. melitensis East Mediterranean	duplicate
GCA_000370685	B. melitensis East Mediterranean	duplicate
GCA_000370705	B. melitensis East Mediterranean	duplicate
GCA_000370725	B. melitensis Americas	duplicate
GCA_000370745	B. melitensis Americas	duplicate
GCA_000370765	B. melitensis Americas	duplicate
GCA_000370785	B. melitensis Americas	duplicate
GCA_000370805	B. melitensis East Mediterranean	duplicate
GCA_000370825	B. melitensis East Mediterranean	duplicate
GCA_000370845	B. melitensis West Mediterranean	duplicate
GCA_000370865	B. melitensis East Mediterranean	duplicate
GCA_000398805	B. abortus clade C1	duplicate
GCA_000399725	B. abortus clade C2	duplicate
GCA_000413495	B. abortus clade C2	duplicate
GCA_000413535	B. abortus clade C2	duplicate
GCA_000413555	B. abortus clade C2	duplicate
GCA_000413575	B. abortus clade C2	duplicate
GCA_000413595	B. abortus clade C2	duplicate
GCA_000413615	B. abortus clade C2	redundant
GCA_000413635	B. abortus clade C2	duplicate
GCA_000413655	B. abortus clade C2	duplicate
GCA_000413675	B. abortus clade C2	duplicate
GCA_000413695	B. abortus clade C2	duplicate
GCA_000413715	B. abortus clade C2	duplicate
GCA_000413735	B. abortus clade C2	duplicate
GCA_000413755	B. abortus clade C2	duplicate
GCA_000413775	B. abortus clade C2	duplicate
GCA_000413795	B. abortus clade C2	duplicate
GCA_000413815	B. abortus clade C2	duplicate
GCA_000413835	B. abortus clade C2	duplicate
GCA_000413955	B. abortus clade C2	duplicate
GCA_000413975	B. abortus clade C2	duplicate
GCA_000413995	B. abortus clade C2	duplicate
GCA_000414015	B. abortus clade C2	duplicate
GCA_000444515	B. melitensis Americas
GCA_000472245	B. abortus clade C2				X	X
GCA_000473805	B. abortus clade C1	pruned 3SNPs GCA_016484075
GCA_000477635	B. abortus clade C1	duplicate
GCA_000478665	B. abortus clade C2	duplicate
GCA_000479955	B. abortus clade C2	duplicate
GCA_000479975	B. melitensis East Mediterranean	duplicate
GCA_000479995	B. abortus clade C2	duplicate
GCA_000480015	B. abortus clade C1	duplicate
GCA_000480075	B. abortus clade C1	duplicate
GCA_000480095	B. melitensis East Mediterranean	duplicate
GCA_000480115	B. abortus clade C1	duplicate
GCA_000480175	B. abortus clade C2	duplicate
GCA_000480215	B. melitensis East Mediterranean	duplicate
GCA_000480235	B. abortus clade A	duplicate
GCA_000480255	B. abortus clade C1	duplicate
GCA_000591005	B. melitensis East Mediterranean
GCA_000685375	B. melitensis East Mediterranean	duplicate
GCA_000705095	B. melitensis East Mediterranean
GCA_000705115	B. melitensis East Mediterranean	redundant
GCA_000714755	B. melitensis East Mediterranean	pruned 16SNPs GCA_001856285
GCA_000739315	B. abortus clade C2	duplicate
GCA_000739325	B. abortus clade C2
GCA_000739335	B. abortus clade C2				X	X
GCA_000740135	B. abortus clade C2	redundant
GCA_000740155	B. abortus clade B	duplicate
GCA_000740175	B. abortus clade C1	duplicate
GCA_000740195	B. abortus clade C1	duplicate
GCA_000740215	B. abortus clade C1	duplicate
GCA_000740295	B. abortus clade C1	duplicate
GCA_000740315	B. abortus clade B	redundant
GCA_000740355	B. melitensis West Mediterranean	duplicate
GCA_000740375	B. abortus clade C2	redundant
GCA_000740395	B. melitensis East Mediterranean	duplicate
GCA_000740415	B. melitensis Americas	duplicate
GCA_000740945	B. abortus clade C1	duplicate
GCA_000742195	B. abortus clade C2	duplicate
GCA_000742215	B. abortus clade C1			X
GCA_000742275	B. abortus clade C2	duplicate
GCA_000755125	B. abortus clade C2	cover pb
GCA_000938035	B. melitensis East Mediterranean	pruned 6SNPs SRR642789				X
GCA_000940435	B. melitensis East Mediterranean	pruned 5SNPs SRR642789				X
GCA_000988815	B. melitensis West Mediterranean	duplicate
GCA_001038665	B. abortus clade C2	duplicate
GCA_001043295	B. abortus clade C1			X	X	X
GCA_001267725	B. abortus clade C2				X	X
GCA_001296965	B. abortus clade C2	104M vaccine group
GCA_001302485	B. melitensis East Mediterranean	pruned 3SNPs GCA_001302495
GCA_001302495	B. melitensis East Mediterranean
GCA_001302525	B. melitensis East Mediterranean	redundant GCA_001302525
GCA_001302545	B. melitensis East Mediterranean
GCA_001307425	B. melitensis East Mediterranean
GCA_001307445	B. melitensis East Mediterranean
GCA_001307475	B. melitensis East Mediterranean					X
GCA_001401915	B. abortus clade C1			X	X	X
GCA_001401925	B. abortus clade C1			X	X	X
GCA_001401935	B. abortus clade C1	redundant
GCA_001401945	B. abortus clade C1	redundant
GCA_001401995	B. abortus clade C2	redundant
GCA_001402005	B. abortus clade C1	redundant
GCA_001402025	B. abortus clade C2
GCA_001402055	B. abortus clade C1			X	X	X
GCA_001402075	B. abortus clade C1			X	X	X
GCA_001402095	B. abortus clade C1			X	X	X
GCA_001402105	B. abortus clade C2				X	X
GCA_001431745	B. melitensis East Mediterranean					X
GCA_001608355	B. melitensis West Mediterranean	duplicate
GCA_001608425	B. melitensis West Mediterranean	duplicate
GCA_001702255	B. melitensis East Mediterranean	duplicate
GCA_001702305	B. melitensis East Mediterranean	duplicate
GCA_001702315	B. melitensis East Mediterranean	duplicate
GCA_001702335	B. melitensis East Mediterranean	pruned 27SNPs SRR4436607 long terminal branch
GCA_001702375	B. melitensis Americas	duplicate
GCA_001715385	B. abortus clade C2	redundant, potentially derived from 2308
GCA_001715465	B. melitensis East Mediterranean					X
GCA_001715485	B. melitensis West Mediterranean	pruned 2013TE28773/1				X
GCA_001715505	B. abortus clade C2	redundant
GCA_001766405	B. melitensis East Mediterranean
GCA_001766425	B. melitensis East Mediterranean
GCA_001766475	B. melitensis East Mediterranean	pruned 6SNPs GCA_001937895
GCA_001856185	B. abortus clade C1			X	X	X
GCA_001856195	B. abortus clade C1			X	X	X
GCA_001856205	B. abortus clade C1			X	X	X
GCA_001856215	B. abortus clade C1	redundant
GCA_001856265	B. abortus clade C1			X	X	X
GCA_001856285	B. melitensis East Mediterranean
GCA_001856295	B. melitensis East Mediterranean
GCA_001856305	B. abortus clade C1			X	X	X
GCA_001856345	B. abortus clade C1			X	X	X
GCA_001856365	B. melitensis East Mediterranean	redundant GCA_900236335
GCA_001857585	B. melitensis East Mediterranean
GCA_001866335	B. abortus clade C2	duplicate derived from 2308
GCA_001937795	B. melitensis East Mediterranean	pruned 8SNPs SRR4436602
GCA_001937805	B. melitensis East Mediterranean	topology_pb
GCA_001937825	B. melitensis East Mediterranean
GCA_001937875	B. melitensis East Mediterranean	redundant
GCA_001937885	B. melitensis East Mediterranean	pruned 12SNPs GCA_001937895
GCA_001937895	B. melitensis East Mediterranean
GCA_001937915	B. melitensis East Mediterranean	topology_pb
GCA_001938045	B. melitensis East Mediterranean	pruned 11SNPs SRR4436607
GCA_001938135	B. melitensis East Mediterranean	redundant
GCA_001938165	B. melitensis East Mediterranean	redundant
GCA_001938175	B. melitensis East Mediterranean	pruned 6SNPs GCA_900236525
GCA_001940595	B. abortus clade C2				X	X
GCA_002150345	B. melitensis East Mediterranean	redundant
GCA_002150355	B. melitensis East Mediterranean	topology_pb
GCA_002150395	B. melitensis East Mediterranean	redundant
GCA_002150445	B. melitensis East Mediterranean	pruned 9SNPs GCA_900236525
GCA_002191235	B. melitensis East Mediterranean	duplicate
GCA_002191255	B. melitensis East Mediterranean	duplicate
GCA_002191295	B. melitensis East Mediterranean	duplicate
GCA_002191315	B. melitensis East Mediterranean	duplicate
GCA_002191335	B. melitensis East Mediterranean	duplicate
GCA_002191355	B. melitensis West Mediterranean	duplicate
GCA_002191375	B. melitensis West Mediterranean	duplicate
GCA_002191395	B. melitensis East Mediterranean	duplicate
GCA_002191415	B. melitensis West Mediterranean	duplicate
GCA_002191435	B. melitensis African	duplicate
GCA_002191455	B. melitensis East Mediterranean	duplicate
GCA_002191475	B. melitensis East Mediterranean	duplicate
GCA_002191495	B. melitensis East Mediterranean	duplicate
GCA_002191515	B. melitensis East Mediterranean	duplicate
GCA_002191535	B. melitensis East Mediterranean	duplicate
GCA_002191555	B. melitensis East Mediterranean	duplicate
GCA_002191575	B. melitensis East Mediterranean	duplicate
GCA_002191595	B. melitensis East Mediterranean	duplicate
GCA_002191615	B. melitensis East Mediterranean	duplicate
GCA_002191635	B. melitensis East Mediterranean	duplicate
GCA_002191655	B. melitensis East Mediterranean	duplicate
GCA_002191675	B. melitensis East Mediterranean	duplicate
GCA_002191695	B. melitensis East Mediterranean	duplicate
GCA_002191715	B. melitensis East Mediterranean	duplicate
GCA_002191735	B. melitensis East Mediterranean	duplicate
GCA_002191755	B. melitensis East Mediterranean	duplicate
GCA_002191775	B. melitensis East Mediterranean	duplicate
GCA_002191795	B. melitensis East Mediterranean	duplicate
GCA_002191815	B. melitensis East Mediterranean	duplicate
GCA_002191855	B. melitensis East Mediterranean	duplicate
GCA_002191875	B. melitensis East Mediterranean	duplicate
GCA_002191895	B. melitensis East Mediterranean	duplicate
GCA_002191915	B. melitensis East Mediterranean	duplicate
GCA_002191935	B. melitensis African	duplicate
GCA_002191995	B. melitensis East Mediterranean	duplicate
GCA_002192015	B. melitensis East Mediterranean	duplicate
GCA_002192035	B. melitensis East Mediterranean	duplicate
GCA_002192055	B. melitensis East Mediterranean	duplicate
GCA_002192075	B. melitensis East Mediterranean	duplicate
GCA_002192095	B. melitensis East Mediterranean	duplicate
GCA_002192115	B. melitensis East Mediterranean	duplicate
GCA_002192135	B. melitensis East Mediterranean	duplicate
GCA_002192155	B. melitensis East Mediterranean	duplicate
GCA_002192175	B. melitensis East Mediterranean	duplicate
GCA_002192195	B. melitensis East Mediterranean	duplicate
GCA_002204265	B. melitensis East Mediterranean	pruned 5SNPs SRR642789
GCA_002204295	B. melitensis East Mediterranean	redundant
GCA_002204335	B. melitensis East Mediterranean	redundant
GCA_002204345	B. melitensis East Mediterranean	redundant
GCA_002214285	B. melitensis East Mediterranean					X
GCA_002245205	B. melitensis East Mediterranean	pruned 4SNPs SRR642789
GCA_002245225	B. melitensis East Mediterranean	pruned 6SNPs SRR642789
GCA_002245235	B. melitensis East Mediterranean	redundant
GCA_002262955	B. melitensis East Mediterranean					X
GCA_002262975	B. abortus clade C1	pruned 11SNPs SRR642791
GCA_002262995	B. abortus clade C1	redundant
GCA_002263015	B. melitensis East Mediterranean					X
GCA_002266745	B. melitensis East Mediterranean	pruned 1SNP SRR4436598
GCA_002266765	B. melitensis East Mediterranean
GCA_002266775	B. melitensis East Mediterranean
GCA_002266785	B. melitensis East Mediterranean
GCA_002278575	B. melitensis East Mediterranean	pruned 11SNPs SRR005737
GCA_002278585	B. melitensis East Mediterranean	pruned 12SNPs GCA_002278715
GCA_002278675	B. melitensis East Mediterranean
GCA_002278695	B. melitensis East Mediterranean
GCA_002278715	B. melitensis East Mediterranean
GCA_002278735	B. melitensis East Mediterranean	assembly iontorrent, excluded from refseq slight branch length excess
GCA_002290125	B. melitensis East Mediterranean					X
GCA_002290665	B. abortus clade C2	redundant
GCA_002290685	B. abortus clade C2	cover pb
GCA_002290725	B. abortus clade C1	cover pb
GCA_002290745	B. abortus clade C2	redundant
GCA_002290765	B. abortus clade C1	pruned 6SNPs GCA_002291285
GCA_002290805	B. abortus clade C1	cover pb
GCA_002291205	B. abortus clade C2	redundant
GCA_002291245	B. abortus clade C2
GCA_002291285	B. abortus clade C1			X	X	X
GCA_002291345	B. abortus clade C2	redundant GCA_023651435
GCA_002291385	B. abortus clade C2	redundant
GCA_002631235	B. melitensis East Mediterranean
GCA_002763615	B. melitensis East Mediterranean	redundant, vaccine derived?
GCA_002871075	B. melitensis East Mediterranean	duplicate
GCA_002895105	B. melitensis East Mediterranean					X
GCA_002895125	B. melitensis East Mediterranean	duplicate				X
GCA_002895145	B. abortus clade C2
GCA_002953595	B. melitensis Americas	duplicate
GCA_003194755	B. abortus clade C2				X	X
GCA_003194765	B. abortus clade C2	redundant
GCA_003194795	B. abortus clade C2	redundant
GCA_003194805	B. abortus clade C2	redundant
GCA_003194825	B. abortus clade C2	redundant
GCA_003194875	B. abortus clade C2	redundant
GCA_003194885	B. abortus clade C2	redundant
GCA_003194895	B. abortus clade C2	redundant
GCA_003205535	B. melitensis East Mediterranean					X
GCA_003244395	B. abortus clade C2	redundant
GCA_003253375	B. abortus clade C2	redundant
GCA_003290345	B. abortus clade C2	redundant
GCA_003432005	B. melitensis East Mediterranean	duplicate
GCA_003452115	B. melitensis Americas	duplicate
GCA_003452125	B. melitensis Americas	duplicate
GCA_003457115	B. melitensis West Mediterranean	duplicate
GCA_003514345	B. melitensis West Mediterranean	duplicate
GCA_003514625	B. melitensis West Mediterranean	duplicate
GCA_003516045	B. melitensis East Mediterranean	homoplasia inducer
GCA_003516065	B. melitensis East Mediterranean	pruned 1SNP GCA_002214285
GCA_003516085	B. melitensis East Mediterranean	homoplasia inducer
GCA_003538745	B. melitensis Americas	duplicate
GCA_003675365	B. abortus clade C1	duplicate
GCA_003856415	B. melitensis East Mediterranean	pruned 7SNPs GCA_009789445
GCA_003965935	B. abortus clade C1	redundant C-615
GCA_003965945	B. abortus clade C1	redundant C-615
GCA_003966035	B. melitensis East Mediterranean	pruned 9SNPs GCA_001856285
GCA_003984745	B. abortus clade C1	redundant C-615
GCA_003984755	B. abortus clade C1			X
GCA_003989635	B. melitensis East Mediterranean	pruned 14SNPs SRR4436599
GCA_003989715	B. abortus clade C2
GCA_003989725	B. abortus clade C2
GCA_003989875	B. melitensis East Mediterranean	redundant GCA_003989635
GCA_003989885	B. melitensis East Mediterranean	redundant GCA_003989635
GCA_003989895	B. melitensis East Mediterranean	redundant GCA_003989635
GCA_003989905	B. abortus clade C2
GCA_003989955	B. abortus clade C2
GCA_003989965	B. abortus clade C2
GCA_003989975	B. abortus clade C2	abnormal branch length
GCA_003991385	B. melitensis East Mediterranean	redundant SRR8278028
GCA_003993825	B. melitensis East Mediterranean	pruned 12SNPs SRR8255646
GCA_003993855	B. melitensis East Mediterranean
GCA_003993875	B. melitensis East Mediterranean
GCA_003993895	B. melitensis East Mediterranean	pruned 2SNPs GCA_002214285
GCA_003993905	B. melitensis East Mediterranean	pruned 15SNPs SRR8255646
GCA_003993935	B. melitensis East Mediterranean
GCA_003993955	B. melitensis East Mediterranean
GCA_003993965	B. melitensis East Mediterranean	pruned 6SNPs SRR12094789
GCA_003993995	B. melitensis East Mediterranean
GCA_003994015	B. melitensis East Mediterranean	pruned 7SNPs GCA_003994015
GCA_003994025	B. abortus clade C1	pruned 16SNPs SRR642791
GCA_003994075	B. abortus clade C1	pruned 5SNPs SRR642791
GCA_003994095	B. melitensis East Mediterranean	pruned 3SNPs SRR12094789
GCA_003994105	B. melitensis East Mediterranean	pruned 5SNPs SRR12094789
GCA_003994115	B. melitensis East Mediterranean
GCA_003994155	B. abortus clade C1			X	X	X
GCA_003994185	B. melitensis East Mediterranean	pruned 3SNPs GCA_002262955
GCA_003994205	B. melitensis East Mediterranean	pruned 9SNPs SRR12094789
GCA_003994435	B. abortus clade C2
GCA_004137225	B. abortus clade C2	redundant ML7
GCA_004137275	B. abortus clade C2	redundant ML7
GCA_004137325	B. abortus clade C2	redundant ML7
GCA_004168605	B. abortus clade C2	redundant ML7
GCA_004168645	B. abortus clade C2	redundant ML7
GCA_004208655	B. melitensis East Mediterranean	pruned 7SNPs SRR12094789
GCA_004208675	B. melitensis East Mediterranean	pruned 11SNPs SRR12094789
GCA_004208695	B. melitensis East Mediterranean
GCA_004704905	B. abortus clade C1	duplicate
GCA_006505895	B. melitensis West Mediterranean	redundant
GCA_006505925	B. melitensis West Mediterranean	redundant
GCA_006505935	B. melitensis West Mediterranean	redundant
GCA_006505995	B. melitensis West Mediterranean	redundant
GCA_006506005	B. melitensis West Mediterranean	redundant ItBM_87
GCA_006506015	B. melitensis West Mediterranean	redundant ItBM_61
GCA_006506025	B. melitensis West Mediterranean	redundant ItBM_83
GCA_006506035	B. melitensis West Mediterranean	redundant ItBM_54
GCA_006506095	B. melitensis West Mediterranean	redundant
GCA_006506105	B. melitensis West Mediterranean	redundant
GCA_006506115	B. melitensis West Mediterranean	redundant
GCA_006506125	B. melitensis West Mediterranean	redundant
GCA_006506135	B. melitensis West Mediterranean	redundant
GCA_006506195	B. melitensis West Mediterranean	redundant
GCA_006506205	B. melitensis West Mediterranean	redundant
GCA_006506215	B. melitensis West Mediterranean	redundant
GCA_006506225	B. melitensis West Mediterranean	redundant
GCA_006506235	B. melitensis West Mediterranean	redundant ItBM_72
GCA_006506295	B. melitensis West Mediterranean	redundant
GCA_006506385	B. melitensis West Mediterranean	redundant
GCA_006506395	B. melitensis West Mediterranean	redundant
GCA_006506425	B. melitensis West Mediterranean	redundant
GCA_006506435	B. melitensis West Mediterranean	redundant ItBM_100
GCA_006506465	B. melitensis West Mediterranean	redundant
GCA_006506485	B. melitensis West Mediterranean	redundant ItBM_70
GCA_006506505	B. melitensis West Mediterranean	redundant
GCA_006506515	B. melitensis West Mediterranean	redundant
GCA_006506545	B. melitensis West Mediterranean	cluster ItBM_31
GCA_006506565	B. melitensis West Mediterranean
GCA_006506575	B. melitensis West Mediterranean	redundant
GCA_006506605	B. melitensis West Mediterranean	redundant
GCA_006506625	B. melitensis West Mediterranean	redundant ItBM_69
GCA_006506635	B. melitensis West Mediterranean	redundant ItBM_68
GCA_006506665	B. melitensis West Mediterranean	redundant
GCA_006506675	B. melitensis West Mediterranean	cluster ItBM_81
GCA_006506685	B. melitensis West Mediterranean	redundant
GCA_006506725	B. melitensis West Mediterranean	redundant ItBM_74
GCA_006506735	B. melitensis West Mediterranean	redundant ItBM_63
GCA_006506745	B. melitensis West Mediterranean	redundant
GCA_006506785	B. melitensis West Mediterranean	redundant
GCA_006506815	B. melitensis West Mediterranean	redundant
GCA_006506835	B. melitensis West Mediterranean	redundant ItBM_77
GCA_006506855	B. melitensis West Mediterranean	redundant ItBM_76
GCA_006506875	B. melitensis West Mediterranean	redundant
GCA_006506895	B. melitensis West Mediterranean	pruned ItBM_97
GCA_006506925	B. melitensis West Mediterranean	redundant
GCA_006506935	B. melitensis West Mediterranean	redundant ItBM_75
GCA_006506965	B. melitensis West Mediterranean	redundant
GCA_006506975	B. melitensis West Mediterranean	redundant
GCA_006506985	B. melitensis West Mediterranean	redundant
GCA_006506995	B. melitensis West Mediterranean	redundant
GCA_006507015	B. melitensis West Mediterranean	redundant ItBM_31
GCA_006507065	B. melitensis West Mediterranean	redundant
GCA_006507075	B. melitensis West Mediterranean	redundant
GCA_006507105	B. melitensis West Mediterranean	redundant
GCA_006507125	B. melitensis West Mediterranean	redundant
GCA_006507135	B. melitensis West Mediterranean	redundant
GCA_006507165	B. melitensis West Mediterranean	cluster ItBM_85
GCA_006507175	B. melitensis West Mediterranean	redundant ItBM_82
GCA_006507185	B. melitensis West Mediterranean	redundant
GCA_006507225	B. melitensis West Mediterranean	redundant
GCA_006507235	B. melitensis West Mediterranean	redundant
GCA_006507245	B. melitensis West Mediterranean	redundant
GCA_006507285	B. melitensis West Mediterranean	redundant
GCA_006507295	B. melitensis West Mediterranean	redundant
GCA_006507325	B. melitensis West Mediterranean	redundant
GCA_006507335	B. melitensis West Mediterranean	redundant
GCA_006507345	B. melitensis West Mediterranean	redundant 2015CB3742/4
GCA_006507365	B. melitensis West Mediterranean	redundant
GCA_006507375	B. melitensis West Mediterranean	redundant
GCA_006507425	B. melitensis West Mediterranean	redundant
GCA_006507445	B. melitensis West Mediterranean	redundant
GCA_006507455	B. melitensis West Mediterranean	redundant
GCA_006507465	B. melitensis West Mediterranean	redundant
GCA_006507475	B. melitensis West Mediterranean	redundant ItBM_67
GCA_006507495	B. melitensis West Mediterranean	redundant 2011TE746/1
GCA_006507545	B. melitensis West Mediterranean	redundant
GCA_006507555	B. melitensis West Mediterranean	redundant ItBM_104
GCA_006507565	B. melitensis West Mediterranean	redundant ItBM_85
GCA_006507585	B. melitensis West Mediterranean	redundant
GCA_006507595	B. melitensis West Mediterranean	redundant
GCA_006507645	B. melitensis Americas
GCA_006507665	B. melitensis West Mediterranean	redundant
GCA_006507675	B. melitensis West Mediterranean	redundant
GCA_006507685	B. melitensis West Mediterranean	redundant
GCA_006507695	B. melitensis West Mediterranean	redundant
GCA_006507745	B. melitensis West Mediterranean	redundant
GCA_006507765	B. melitensis West Mediterranean	redundant
GCA_006507775	B. melitensis West Mediterranean	redundant ItBM_37
GCA_006507795	B. melitensis West Mediterranean	redundant
GCA_006507815	B. melitensis East Mediterranean	redundant SRR6957972
GCA_006507825	B. melitensis West Mediterranean	redundant ItBM_45
GCA_006507855	B. melitensis West Mediterranean	redundant
GCA_006507875	B. melitensis West Mediterranean	redundant
GCA_006507905	B. melitensis West Mediterranean	redundant 2011.TE.11802.1.1
GCA_006507915	B. melitensis West Mediterranean	redundant
GCA_006507945	B. melitensis West Mediterranean	redundant
GCA_006507965	B. melitensis West Mediterranean	redundant
GCA_006507975	B. melitensis West Mediterranean	redundant
GCA_006508005	B. melitensis West Mediterranean	redundant
GCA_006508015	B. melitensis West Mediterranean	redundant ItBM_81
GCA_006508025	B. melitensis West Mediterranean	redundant
GCA_006508035	B. melitensis West Mediterranean	redundant
GCA_006517295	B. melitensis West Mediterranean	redundant
GCA_006517305	B. melitensis West Mediterranean	redundant
GCA_006517315	B. melitensis West Mediterranean	redundant
GCA_006517325	B. melitensis West Mediterranean	redundant
GCA_006517335	B. melitensis West Mediterranean	redundant
GCA_008761575	B. abortus clade C2
GCA_008761595	B. melitensis East Mediterranean	pruned 1SNP SRR8255646
GCA_008761615	B. melitensis East Mediterranean	redundant
GCA_009017355	B. melitensis East Mediterranean
GCA_009017395	B. melitensis East Mediterranean
GCA_009728165	B. abortus clade C1	redundant GCA_016484075
GCA_009728185	B. abortus clade C1			X	X	X
GCA_009733175	B. abortus clade C1			X	X	X
GCA_009733195	B. abortus clade C1			X	X	X
GCA_009733205	B. abortus clade C1			X	X	X
GCA_009733215	B. abortus clade C1			X	X	X
GCA_009733255	B. abortus clade C1	pruned 3 SNPs GCA_016483915		X
GCA_009733275	B. abortus clade C1			X	X	X
GCA_009733285	B. abortus clade C1			X	X	X
GCA_009733315	B. melitensis East Mediterranean
GCA_009733335	B. abortus clade C1			X	X	X
GCA_009733355	B. melitensis East Mediterranean
GCA_009733365	B. abortus clade C1			X
GCA_009733375	B. abortus clade C1			X	X	X
GCA_009733415	B. melitensis East Mediterranean	identification issue
GCA_009733435	B. abortus clade C1			X	X	X
GCA_009733455	B. abortus clade C1			X	X	X
GCA_009733465	B. abortus clade C1			X	X	X
GCA_009733495	B. abortus clade C1			X	X	X
GCA_009733515	B. melitensis East Mediterranean	redundant GCA_016091965
GCA_009789215	B. abortus clade C1			X	X	X
GCA_009789295	B. melitensis East Mediterranean	pruned 2SNPs GCA_002262955
GCA_009789305	B. melitensis East Mediterranean	pruned 3SNPs GCA_002263015
GCA_009789335	B. melitensis East Mediterranean
GCA_009789345	B. melitensis East Mediterranean	pruned 8SNPs GCA_023796775
GCA_009789365	B. abortus clade C1			X	X	X
GCA_009789395	B. melitensis East Mediterranean	pruned 10SNPs GCA_017311425
GCA_009789415	B. melitensis East Mediterranean	pruned 3SNPs GCA_002262955
GCA_009789435	B. melitensis East Mediterranean
GCA_009789445	B. melitensis East Mediterranean
GCA_009789465	B. melitensis East Mediterranean	pruned 3SNPs GCA_002263015
GCA_009797905	B. melitensis East Mediterranean	duplicate
GCA_009823705	B. melitensis East Mediterranean	pruned 5SNPs SRR12094789
GCA_011801185	B. abortus clade C2
GCA_013425785	B. abortus clade C2				X	X
GCA_014270005	B. melitensis East Mediterranean	duplicate
GCA_016091955	B. melitensis East Mediterranean	identification issue
GCA_016091965	B. melitensis East Mediterranean	identification issue pruned 18SNPs GCA_001307475
GCA_016107505	B. abortus clade C1	branch 15SNPs longer than neighbors
GCA_016126075	B. abortus clade C1			X	X	X
GCA_016126095	B. abortus clade C2	pruned 11SNPs S19
GCA_016126105	B. abortus clade C1			X	X	X
GCA_016126115	B. abortus clade C1	redundant GCA_016126105
GCA_016126135	B. abortus clade C1			X	X	X
GCA_016126175	B. abortus clade C1			X	X	X
GCA_016126195	B. abortus clade C1			X	X	X
GCA_016126205	B. abortus clade C1			X	X	X
GCA_016126215	B. abortus clade C1			X	X	X
GCA_016126245	B. abortus clade C1			X	X	X
GCA_016411965	B. melitensis East Mediterranean
GCA_016483915	B. abortus clade C1			X	X	X
GCA_016483965	B. abortus clade C1			X	X	X
GCA_016483975	B. abortus clade C1			X	X	X
GCA_016484065	B. abortus clade C1			X	X	X
GCA_016484075	B. abortus clade C1			X	X	X
GCA_016484145	B. abortus clade C1			X	X	X
GCA_016806105	B. melitensis East Mediterranean
GCA_016887525	B. melitensis East Mediterranean	redundant SRR8255646
GCA_017139975	B. melitensis East Mediterranean	redundant GCA_017140095
GCA_017140095	B. melitensis East Mediterranean	pruned 10SNPs SRR4436622
GCA_017177315	B. melitensis East Mediterranean	pruned 9SNPs SRR4436622
GCA_017177325	B. melitensis West Mediterranean	redundant Bm-877
GCA_017177355	B. melitensis West Mediterranean
GCA_017177365	B. melitensis West Mediterranean	redundant Bm-877
GCA_017177395	B. melitensis East Mediterranean	pruned 15SNPs SRR4436622
GCA_017177415	B. melitensis East Mediterranean	redundant SRR12272637
GCA_017177425	B. melitensis West Mediterranean
GCA_017177445	B. melitensis East Mediterranean
GCA_017177475	B. melitensis East Mediterranean	pruned 10SNPs SRR4436622
GCA_017177485	B. melitensis East Mediterranean	redundant GCA_017177515
GCA_017177515	B. melitensis East Mediterranean	pruned 7SNPs SRR4436622
GCA_017177535	B. melitensis East Mediterranean	pruned 3SNPs SRR4436622
GCA_017177615	B. melitensis East Mediterranean
GCA_017177675	B. melitensis West Mediterranean
GCA_017177695	B. melitensis East Mediterranean	pruned 5SNPs SRR646250
GCA_017177715	B. melitensis East Mediterranean	pruned 10SNPs GCA_017177715
GCA_017177735	B. melitensis East Mediterranean
GCA_017177745	B. melitensis West Mediterranean	duplicate
GCA_017177815	B. melitensis West Mediterranean	pruned Bm-877
GCA_017177825	B. melitensis West Mediterranean	redundant Bm-877
GCA_017177855	B. melitensis West Mediterranean	redundant Bm-877
GCA_017177875	B. melitensis East Mediterranean	redundant GCA_017177895
GCA_017177895	B. melitensis East Mediterranean	pruned 4SNPs SRR646250
GCA_017311425	B. melitensis East Mediterranean
GCA_018604785	B. melitensis East Mediterranean	redundant SRR1219642
GCA_022348405	B. melitensis East Mediterranean
GCA_022426825	B. abortus clade C2				X	X
GCA_022426845	B. abortus clade C2	pruned 4SNPs SRR1371296
GCA_022426865	B. abortus clade C2	pruned 8SNPs GCA_022426895
GCA_022426885	B. abortus clade C2	pruned 2SNPs GCA_022426895
GCA_022426895	B. abortus clade C2				X	X
GCA_023093775	B. melitensis East Mediterranean
GCA_023650975	B. abortus clade C2	redundant GCA_023651455
GCA_023650995	B. abortus clade C2	redundant GCA_023651435
GCA_023651015	B. abortus clade C2	pruned 1SNPs GCA_023651435
GCA_023651035	B. abortus clade C2	redundant GCA_023651115
GCA_023651055	B. abortus clade C2	pruned 2SNPs GCA_023651435
GCA_023651075	B. abortus clade C2	redundant GCA_023651455
GCA_023651095	B. abortus clade C2	redundant GCA_023651455
GCA_023651115	B. abortus clade C2	pruned 5SNPs GCA_023651675
GCA_023651135	B. abortus clade C2	redundant GCA_023651435
GCA_023651155	B. abortus clade C2	redundant GCA_023651435
GCA_023651175	B. abortus clade C2	redundant GCA_023651675
GCA_023651195	B. abortus clade C2	pruned 5SNPs GCA_023651435
GCA_023651215	B. abortus clade C2	redundant GCA_023651315
GCA_023651235	B. abortus clade C2	redundant GCA_023651315
GCA_023651255	B. abortus clade C2	pruned 2SNPs GCA_023651435
GCA_023651275	B. abortus clade C2	redundant GCA_023651195
GCA_023651295	B. abortus clade C2	pruned 3SNPs GCA_023651435
GCA_023651315	B. abortus clade C2	pruned 8SNPs GCA_023651435
GCA_023651335	B. abortus clade C2	pruned 8SNPs GCA_023651435
GCA_023651355	B. abortus clade C2	redundant GCA_023651015
GCA_023651375	B. abortus clade C2	pruned 1SNP GCA_023651675
GCA_023651395	B. abortus clade C2	redundant GCA_023651495 poor cover
GCA_023651415	B. abortus clade C2	pruned 4SNPs GCA_023651675
GCA_023651435	B. abortus clade C2				X	X
GCA_023651455	B. abortus clade C2	pruned 2SNPs GCA_023651435
GCA_023651475	B. abortus clade C2	redundant GCA_023651435
GCA_023651495	B. abortus clade C2	pruned 3SNPs GCA_023651675
GCA_023651515	B. abortus clade C2	pruned 1SNPs GCA_023651435
GCA_023651535	B. abortus clade C2	redundant GCA_023651435
GCA_023651555	B. abortus clade C2	pruned 1SNPs GCA_023651435
GCA_023651575	B. abortus clade C2	redundant GCA_023651435
GCA_023651595	B. abortus clade C2	redundant GCA_023651435
GCA_023651615	B. abortus clade C2	redundant GCA_023651015
GCA_023651635	B. abortus clade C2	redundant GCA_023651435
GCA_023651655	B. abortus clade C2	redundant GCA_023651455
GCA_023651675	B. abortus clade C2	pruned 17SNPs GCA_023651435
GCA_023651695	B. abortus clade C2	pruned 1SNPs GCA_023651435
GCA_023651805	B. abortus clade C2	pruned 3SNPs GCA_023651435
GCA_023651845	B. abortus clade C2	pruned 3SNPs GCA_023651435
GCA_023704275	B. abortus clade C2	pruned 2SNPs GCA_023651435
GCA_023796775	B. melitensis East Mediterranean
GCA_900095085	B. abortus clade C2	duplicate
GCA_900236335	B. melitensis East Mediterranean					X
GCA_900236345	B. melitensis East Mediterranean	long branch 40 SNPs excess and genome coverage for assembly 19x only				X
GCA_900236355	B. melitensis East Mediterranean					X
GCA_900236365	B. melitensis East Mediterranean	redundant
GCA_900236375	B. melitensis Americas	duplicate
GCA_900236385	B. melitensis East Mediterranean	redundant
GCA_900236395	B. melitensis East Mediterranean	duplicate
GCA_900236405	B. melitensis East Mediterranean	duplicate
GCA_900236415	B. melitensis East Mediterranean	duplicate
GCA_900236425	B. melitensis African					X
GCA_900236435	B. melitensis East Mediterranean	duplicate
GCA_900236445	B. melitensis East Mediterranean	duplicate
GCA_900236455	B. melitensis East Mediterranean	duplicate
GCA_900236465	B. melitensis East Mediterranean	duplicate
GCA_900236485	B. melitensis Americas	duplicate
GCA_900236495	B. melitensis Americas	duplicate
GCA_900236515	B. melitensis East Mediterranean	duplicate
GCA_900236525	B. melitensis East Mediterranean					X
GCA_900236535	B. melitensis African					X
GCA_900236545	B. melitensis East Mediterranean	duplicate
GCA_900236555	B. melitensis East Mediterranean	duplicate
GCA_900236565	B. melitensis East Mediterranean	pruned 4SNPs SRR4436580				X
GCA_900236575	B. melitensis East Mediterranean	duplicate
GCA_900236585	B. melitensis Americas	duplicate
GCA_900417195	B. melitensis West Mediterranean	cluster 00-2782
GCA_900417205	B. melitensis West Mediterranean	redundant 00-2782
GCA_900417215	B. melitensis West Mediterranean	redundant 00-2782
GCA_900417225	B. melitensis West Mediterranean	redundant 00-2782
GCA_900417235	B. melitensis West Mediterranean
GCA_900417245	B. melitensis West Mediterranean	redundant 00-2782
GCA_900417255	B. melitensis West Mediterranean	cluster 00-2782
GCA_900446005	B. abortus clade C2	duplicate
GCA_900446015	B. abortus clade C2				X	X
GCA_900446025	B. abortus clade C2				X	X
GCA_900446035	B. melitensis East Mediterranean	duplicate
GCA_900446045	B. abortus clade C2				X	X
GCA_900446055	B. abortus clade C2	S 19 representative
GCA_900446065	B. abortus clade C2	pruned 2SNPs ERR8027289
GCA_900446075	B. melitensis Americas
GCA_900446085	B. melitensis West Mediterranean	duplicate
GCA_900446095	B. melitensis East Mediterranean
GCF_000007125	B. melitensis Americas	16M reference
SRR004167	B. abortus clade C2	poor cover duplicate
SRR004169	B. abortus clade B	duplicate
SRR004170	B. abortus clade B	duplicate
SRR004172	B. abortus clade C1	duplicate
SRR004234	B. abortus clade C1	duplicate
SRR004235	B. abortus clade C1	duplicate
SRR004293	B. abortus clade C1	duplicate
SRR004296	B. melitensis West Mediterranean	duplicate
SRR005736	B. melitensis East Mediterranean
SRR005737	B. melitensis East Mediterranean					X
SRR005738	B. melitensis African
SRR005739	B. melitensis Americas					X
SRR005742	B. melitensis East Mediterranean	pruned 11SNPs BCCN#76-325
SRR005743	B. melitensis African
SRR005744	B. melitensis East Mediterranean	pruned 6SNPs SRR8255646				X
SRR005748	B. melitensis East Mediterranean	pruned 7SNPs SRR3927455
SRR005749	B. melitensis East Mediterranean	duplicate
SRR005750	B. melitensis African					X
SRR005751	B. melitensis East Mediterranean
SRR005752	B. melitensis East Mediterranean	redundant
SRR005753	B. melitensis East Mediterranean	pruned 3SNPs SRR642834				X
SRR005754	B. melitensis East Mediterranean
SRR005755	B. melitensis East Mediterranean					X
SRR005756	B. melitensis East Mediterranean					X
SRR011097	B. abortus clade C2	cover pb and duplicate
SRR011104	B. melitensis Americas	duplicate
SRR011105	B. melitensis Americas	duplicate
SRR011160	B. melitensis East Mediterranean	duplicate
SRR011161	B. melitensis East Mediterranean	duplicate
SRR011162	B. melitensis East Mediterranean	duplicate
SRR016340	B. abortus clade C2	redundant, derived from RB51
SRR016341	B. melitensis East Mediterranean	pruned 4SNPs SRR11178085
SRR016342	B. melitensis West Mediterranean	redundant
SRR016343	B. abortus clade C2
SRR016344	B. abortus clade C2	redundant, S19 group
SRR016345	B. abortus clade C2				X	X
SRR016346	B. abortus clade C2
SRR016347	B. melitensis Americas
SRR016348	B. melitensis Americas
SRR016349	B. abortus clade C2
SRR016350	B. abortus clade C2
SRR016351	B. abortus clade C2
SRR016352	B. abortus clade C2
SRR016353	B. abortus clade C2
SRR016354	B. abortus clade C2	redundant, S19 group
SRR016355	B. abortus clade C2
SRR016356	B. abortus clade C2	duplicate
SRR016366	B. melitensis Americas
SRR016368	B. abortus clade C2
SRR016369	B. abortus clade C2				X	X
SRR016370	B. melitensis Americas
SRR016371	B. melitensis Americas	redundant
SRR016372	B. melitensis East Mediterranean	pruned 13SNPs SRR005751
SRR016373	B. melitensis Americas
SRR016374	B. melitensis Americas
SRR016375	B. melitensis Americas
SRR017413	B. abortus clade C2	duplicate
SRR032599	B. abortus clade C1	duplicate
SRR032601	B. melitensis Americas	duplicate
SRR032623	B. abortus clade C2	duplicate
SRR032624	B. abortus clade C2	poor cover duplicate
SRR032625	B. abortus clade B	duplicate
SRR032626	B. abortus clade C2	cover pb and duplicate
SRR032627	B. abortus clade C2	cover pb and duplicate
SRR032629	B. abortus clade C1	duplicate
SRR10249444	B. abortus clade C2	redundant NI192
SRR10249445	B. abortus clade C2	redundant NI192
SRR10249446	B. abortus clade C2	redundant NI435a
SRR10249447	B. abortus clade C2	redundant NI435a
SRR10249448	B. abortus clade C2	redundant NI192
SRR10249449	B. abortus clade C2	redundant NI435a
SRR10249450	B. abortus clade C2	redundant NI435a
SRR10249451	B. abortus clade C2
SRR10249452	B. abortus clade C2
SRR10249453	B. abortus clade C2	redundant NI435a
SRR10249454	B. abortus clade C2	redundant NI435a
SRR10249455	B. abortus clade C2
SRR10249456	B. abortus clade C2	redundant NI435a
SRR10249457	B. abortus clade C2
SRR10249458	B. abortus clade C2	redundant NI435a
SRR10249459	B. abortus clade C2
SRR10249460	B. abortus clade C2	redundant NI435a
SRR10249461	B. abortus clade C2
SRR10249462	B. abortus clade C2
SRR10249463	B. abortus clade C2
SRR10249464	B. abortus clade C2	redundant NI192
SRR10249465	B. abortus clade C2	redundant NI192
SRR10249466	B. abortus clade C2
SRR10249467	B. abortus clade C2	redundant NI192
SRR10249468	B. abortus clade C2	redundant NI192
SRR10249469	B. abortus clade C2
SRR10249470	B. abortus clade C2	redundant NI192
SRR10249471	B. abortus clade C2	redundant NI192
SRR10249472	B. abortus clade C2	redundant NI192
SRR10249473	B. abortus clade C2	redundant NI192
SRR10249474	B. abortus clade C2	redundant NI192
SRR10249475	B. abortus clade C2	redundant NI192
SRR10249476	B. abortus clade C2	redundant NI192
SRR10249477	B. abortus clade C2	redundant NI435a
SRR10249478	B. abortus clade C2	redundant NI192
SRR10249479	B. abortus clade C2				X	X
SRR10249480	B. abortus clade C2
SRR10249481	B. abortus clade C2
SRR10249482	B. abortus clade C2
SRR10249483	B. abortus clade C2
SRR10249484	B. abortus clade C2
SRR10249485	B. abortus clade C2
SRR10249486	B. abortus clade C2
SRR10249487	B. abortus clade C2
SRR10249488	B. abortus clade C2
SRR10249489	B. abortus clade C2	redundant NI192
SRR10249490	B. abortus clade C2	redundant NI192
SRR10249491	B. abortus clade C2	redundant NI192
SRR10249492	B. abortus clade C2	redundant NI435a
SRR10249493	B. abortus clade C2
SRR10249494	B. abortus clade C2
SRR10249495	B. abortus clade C2	redundant NI435a
SRR10249496	B. abortus clade C2
SRR10249497	B. abortus clade C2
SRR10249498	B. abortus clade C2	redundant NI192
SRR10249499	B. abortus clade C2
SRR10249500	B. abortus clade C2	redundant NI192
SRR10249501	B. abortus clade C2
SRR10249502	B. abortus clade C2	redundant NI192
SRR10249503	B. abortus clade C2
SRR10249504	B. abortus clade C2	redundant NI192
SRR10249505	B. abortus clade C2	redundant NI192
SRR10249506	B. abortus clade C2
SRR10249507	B. abortus clade C2
SRR10249508	B. abortus clade C2	redundant NI192
SRR10249509	B. abortus clade C2	redundant NI192
SRR10249510	B. abortus clade C2	redundant NI192
SRR10249511	B. abortus clade C2	redundant NI192
SRR10249512	B. abortus clade C2
SRR10249513	B. abortus clade C2	redundant NI435a
SRR10249514	B. abortus clade C2	redundant NI192
SRR10249515	B. abortus clade C2
SRR10249516	B. abortus clade C2	redundant NI192
SRR10249517	B. abortus clade C2
SRR10249518	B. abortus clade C2	redundant NI435a
SRR10249519	B. abortus clade C2
SRR11178063	B. melitensis East Mediterranean	cluster BCCN#93-40
SRR11178064	B. melitensis East Mediterranean	redundant SRR11178085
SRR11178065	B. melitensis East Mediterranean
SRR11178066	B. melitensis East Mediterranean	cluster BCCN#93-40
SRR11178067	B. melitensis East Mediterranean	cluster BCCN#93-40
SRR11178068	B. melitensis East Mediterranean	cluster BCCN#93-40
SRR11178069	B. melitensis East Mediterranean	cluster BCCN#93-40
SRR11178070	B. melitensis East Mediterranean	cluster BCCN#93-40
SRR11178071	B. melitensis East Mediterranean	redundant Bm-12
SRR11178072	B. melitensis East Mediterranean	pruned 12SNPsSRR11178075
SRR11178073	B. melitensis East Mediterranean	pruned 2SNPs SRR11178085
SRR11178074	B. melitensis East Mediterranean	redundant Bm-9
SRR11178075	B. melitensis East Mediterranean
SRR11178076	B. melitensis East Mediterranean	cluster BCCN#93-40
SRR11178077	B. melitensis East Mediterranean	cluster BCCN#93-40
SRR11178078	B. melitensis East Mediterranean	redundant Bm-22
SRR11178079	B. melitensis East Mediterranean	pruned 2SNPs SRR11178085
SRR11178080	B. melitensis East Mediterranean	pruned 1SNP SRR11178075
SRR11178081	B. melitensis East Mediterranean	cluster BCCN#93-40
SRR11178082	B. melitensis East Mediterranean	redundant Bm-9
SRR11178083	B. melitensis East Mediterranean	pruned 13SNPsSRR11178075
SRR11178084	B. melitensis East Mediterranean	pruned 3SNPs SRR11178084
SRR11178085	B. melitensis East Mediterranean	pruned 6SNPs SRR11178075
SRR11178086	B. melitensis East Mediterranean	redundant Bm-9
SRR11178087	B. melitensis East Mediterranean	cluster BCCN#93-40
SRR11178088	B. melitensis East Mediterranean	redundant Bm-17
SRR11178089	B. melitensis East Mediterranean	redundant Bm-9
SRR11448969	B. melitensis West Mediterranean	cluster ItBM_69
SRR11448970	B. melitensis West Mediterranean	cluster 2014TE9789/1
SRR11448971	B. melitensis West Mediterranean	redundant 2018TE25874/1
SRR11448972	B. melitensis West Mediterranean	cluster ItBM_85
SRR11448973	B. melitensis West Mediterranean
SRR11448974	B. melitensis West Mediterranean	redundant 2013TE17316/1
SRR11448975	B. melitensis West Mediterranean	cluster R3/07-2
SRR11448976	B. melitensis West Mediterranean	redundant ItBM_68
SRR11448977	B. melitensis West Mediterranean	redundant 2013TE13524/1
SRR11448978	B. melitensis West Mediterranean	pruned 2018TE7507/1
SRR11448979	B. melitensis West Mediterranean
SRR11448980	B. melitensis West Mediterranean
SRR11448981	B. melitensis West Mediterranean	pruned ItBM_53
SRR11448982	B. melitensis West Mediterranean	pruned 2013TE26946/3
SRR11448983	B. melitensis West Mediterranean	redundant 2014TE2501/1
SRR11448984	B. melitensis West Mediterranean	pruned ItBM_40
SRR11448985	B. melitensis West Mediterranean
SRR11448986	B. melitensis West Mediterranean	redundant 2013TE26971/1
SRR11448987	B. melitensis West Mediterranean	cluster 2015TE3937/1
SRR11448988	B. melitensis West Mediterranean
SRR11448989	B. melitensis West Mediterranean	cluster 2013TE17316/1
SRR11448990	B. melitensis West Mediterranean	redundant 2014TE9786/1
SRR11448991	B. melitensis West Mediterranean	redundant 2011TE746/1
SRR11448992	B. melitensis West Mediterranean	redundant 2013TE26967/1
SRR11448993	B. melitensis West Mediterranean
SRR11448994	B. melitensis West Mediterranean	redundant 2013TE26967/1
SRR11448995	B. melitensis West Mediterranean
SRR11448996	B. melitensis West Mediterranean	pruned ItBM_58
SRR11448997	B. melitensis West Mediterranean	cluster 2013TE13502/1
SRR11448998	B. melitensis West Mediterranean	pruned ItBM_72
SRR11448999	B. melitensis West Mediterranean
SRR11449000	B. melitensis West Mediterranean	redundant 2013TE13530/1
SRR11449001	B. melitensis West Mediterranean	redundant R3/07-2
SRR11449002	B. melitensis West Mediterranean	pruned BCCN#97-34
SRR11449003	B. melitensis West Mediterranean	pruned ItBM_40
SRR11449004	B. melitensis West Mediterranean	redundant ItBM_108
SRR11449005	B. melitensis West Mediterranean	pruned BwIM_ITA_45
SRR11449006	B. melitensis West Mediterranean	pruned 2013TE28773/1
SRR11449007	B. melitensis West Mediterranean	redundant ItBM_102
SRR11449008	B. melitensis West Mediterranean	redundant 2013TE17316/1
SRR11449009	B. melitensis West Mediterranean	redundant 2013TE17316/1
SRR11449010	B. melitensis West Mediterranean	redundant 2014TE9789/1
SRR11449011	B. melitensis West Mediterranean	cluster 2013TE17316/1
SRR11449012	B. melitensis West Mediterranean	redundant 2013TE29720/1
SRR11449013	B. melitensis West Mediterranean
SRR11449014	B. melitensis West Mediterranean	pruned ItBM_37
SRR11449015	B. melitensis West Mediterranean	pruned 2013TE17112/1
SRR11449016	B. melitensis West Mediterranean
SRR11449017	B. melitensis West Mediterranean	pruned 2013TE26946/3
SRR11449018	B. melitensis West Mediterranean	pruned 2013TE29734/1
SRR11449019	B. melitensis West Mediterranean	cluster 2016TE10815/1
SRR11449020	B. melitensis West Mediterranean	redundant 2013TE26967/1
SRR11449021	B. melitensis West Mediterranean
SRR11449022	B. melitensis West Mediterranean
SRR11449023	B. melitensis West Mediterranean	pruned ItBM_40
SRR11449024	B. melitensis West Mediterranean	redundant ItBM_97
SRR11449025	B. melitensis West Mediterranean	redundant 2013TE13502/1
SRR11449026	B. melitensis West Mediterranean	cluster ItBM_81
SRR11449027	B. melitensis West Mediterranean	redundant 2013TE13530/1
SRR11449028	B. melitensis West Mediterranean	redundant 2013TE13530/1
SRR11449029	B. melitensis West Mediterranean	cluster 2014TE9789/1
SRR11449030	B. melitensis West Mediterranean
SRR11449031	B. melitensis West Mediterranean	cluster 2013TE7096/1
SRR11449032	B. melitensis West Mediterranean	pruned 2013TE15006/1
SRR11449033	B. melitensis West Mediterranean	pruned 2016TE10938/1
SRR11449034	B. melitensis West Mediterranean	pruned 2014TE9786/1
SRR11449035	B. melitensis West Mediterranean	cluster F15/06-7
SRR11449036	B. melitensis West Mediterranean	redundant 2013TE32997/1
SRR11449037	B. melitensis West Mediterranean	cluster ItBM_85
SRR11449038	B. melitensis West Mediterranean	cluster 2014TE9789/1
SRR11449039	B. melitensis West Mediterranean	redundant 2014TE9789/1
SRR11449040	B. melitensis West Mediterranean	cluster R3/07-2
SRR11449041	B. melitensis West Mediterranean	redundant ItBM_108
SRR11449042	B. melitensis West Mediterranean	redundant 2016TE10812/1
SRR11449043	B. melitensis West Mediterranean	redundant 2013TE17316/1
SRR11449044	B. melitensis West Mediterranean	pruned ItBM_104
SRR11449045	B. melitensis West Mediterranean	pruned ItBM_40
SRR11449046	B. melitensis West Mediterranean	redundant 2013TE29708/1
SRR11449047	B. melitensis West Mediterranean	cluster ItBM_69
SRR11449048	B. melitensis West Mediterranean	cluster 2015TE3937/1
SRR11449049	B. melitensis West Mediterranean
SRR11449050	B. melitensis West Mediterranean	redundant 2013TE13530/1
SRR11449051	B. melitensis West Mediterranean	redundant ItBM_81
SRR11449052	B. melitensis West Mediterranean	redundant 2013TE13530/1
SRR11449053	B. melitensis West Mediterranean	redundant 2013TE13530/1
SRR11449054	B. melitensis West Mediterranean	cluster 2015TE3937/1
SRR11449055	B. melitensis West Mediterranean	redundant 2013TE13530/1
SRR11449056	B. melitensis West Mediterranean	redundant 2013TE13530/1
SRR11449057	B. melitensis West Mediterranean	redundant R3/07-2
SRR11449058	B. melitensis West Mediterranean	pruned 2015TE20249/2
SRR11449059	B. melitensis West Mediterranean	redundant 2013TE29722/1
SRR11449060	B. melitensis West Mediterranean
SRR11449061	B. melitensis West Mediterranean	pruned 2018TE2150/1
SRR11449062	B. melitensis West Mediterranean	redundant ItBM_81
SRR11449063	B. melitensis West Mediterranean	cluster F15/06-7
SRR11449064	B. melitensis West Mediterranean	redundant 2013TE29708/1
SRR11449065	B. melitensis West Mediterranean	redundant 2013TE29708/1
SRR11449066	B. melitensis West Mediterranean	redundant 2016TE20391/1
SRR11449067	B. melitensis West Mediterranean	cluster ItBM_89
SRR11449068	B. melitensis West Mediterranean	redundant ItBM_89
SRR11450780	B. melitensis West Mediterranean	redundant 2015TE20249/2
SRR11450781	B. melitensis West Mediterranean	redundant 2018TE2066/1
SRR11450782	B. melitensis West Mediterranean	cluster 2018TE2150/1
SRR11450783	B. melitensis West Mediterranean	cluster 2016TE10815/1
SRR11450784	B. melitensis West Mediterranean	cluster 2018TE2150/1
SRR11450785	B. melitensis West Mediterranean
SRR11450786	B. melitensis West Mediterranean	redundant 2018TE2066/1
SRR11450787	B. melitensis West Mediterranean	redundant 2016TE12384/1
SRR11450788	B. melitensis West Mediterranean	cluster ItBM_31
SRR11450789	B. melitensis West Mediterranean	cluster 2013TE13502/1
SRR11450790	B. melitensis West Mediterranean	redundant 2013TE26967/1
SRR11450791	B. melitensis West Mediterranean	redundant 2016TE12367/1
SRR11450792	B. melitensis West Mediterranean	pruned ItBM_89
SRR11450793	B. melitensis West Mediterranean	cluster ItBM_85
SRR11450794	B. melitensis West Mediterranean	redundant 2016TE12370/1
SRR11450795	B. melitensis West Mediterranean	redundant 2016TE6412/1
SRR11450796	B. melitensis West Mediterranean
SRR11450797	B. melitensis West Mediterranean
SRR11450798	B. melitensis West Mediterranean	redundant 2016TE25775/1
SRR11450799	B. melitensis West Mediterranean	cluster ItBM_31
SRR11450800	B. melitensis West Mediterranean	cluster 2015TE3937/1
SRR11450801	B. melitensis West Mediterranean	redundant 2015TE16666/1
SRR11450802	B. melitensis West Mediterranean	redundant 2016TE10938/1
SRR11450803	B. melitensis West Mediterranean	redundant 2016TE10938/1
SRR11450804	B. melitensis West Mediterranean	redundant 2016TE10938/1
SRR11450805	B. melitensis West Mediterranean	redundant 2016TE10938/1
SRR11450806	B. melitensis West Mediterranean	redundant 2016TE10938/1
SRR11450807	B. melitensis West Mediterranean
SRR11450808	B. melitensis West Mediterranean	redundant 2016TE10938/1
SRR11450809	B. melitensis West Mediterranean	redundant 2016TE6412/1
SRR11450810	B. melitensis West Mediterranean	redundant 2015CB3742/4
SRR11450811	B. melitensis West Mediterranean	redundant 2016TE6412/1
SRR11450812	B. melitensis West Mediterranean
SRR11450813	B. melitensis West Mediterranean	redundant 2016TE10815/1
SRR11450814	B. melitensis West Mediterranean	redundant 2016TE10815/1
SRR11450815	B. melitensis West Mediterranean	cluster 2016TE6409/1
SRR11450816	B. melitensis West Mediterranean	redundant 2016TE1581/1
SRR11450817	B. melitensis West Mediterranean	pruned 2018TE2150/1
SRR11450818	B. melitensis West Mediterranean	cluster 2013TE17316/1
SRR11450819	B. melitensis West Mediterranean	redundant 2016TE6412/1
SRR11450820	B. melitensis West Mediterranean	pruned 2016TE12367/1
SRR11450821	B. melitensis West Mediterranean	cluster ItBM_31
SRR11450822	B. melitensis West Mediterranean	pruned 2016TE12367/1
SRR11450823	B. melitensis West Mediterranean	redundant ItBM_82
SRR11450824	B. melitensis West Mediterranean	redundant 2016TE6412/1
SRR11450825	B. melitensis West Mediterranean	cluster 2016TE6409/1
SRR11450826	B. melitensis West Mediterranean	redundant 2015TE6233/2
SRR11450827	B. melitensis West Mediterranean	redundant 2015TE6231/2
SRR11450828	B. melitensis West Mediterranean	redundant 2015TE6231/2
SRR11450829	B. melitensis West Mediterranean	redundant 2015TE6231/2
SRR11450830	B. melitensis West Mediterranean
SRR11450831	B. melitensis West Mediterranean	redundant 2015TE6231/2
SRR11450832	B. melitensis West Mediterranean	pruned 2018TE7507/1
SRR11450833	B. melitensis West Mediterranean	redundant 2015TE3937/1
SRR11450834	B. melitensis West Mediterranean	redundant 2015TE3937/1
SRR11450835	B. melitensis West Mediterranean	cluster 2015TE3937/1
SRR11450836	B. melitensis West Mediterranean	cluster 2015TE3937/1
SRR11450837	B. melitensis West Mediterranean
SRR11450838	B. melitensis West Mediterranean	cluster ItBM_31
SRR11450839	B. melitensis West Mediterranean	cluster ItBM_31
SRR11450840	B. melitensis West Mediterranean	cluster ItBM_37
SRR11450841	B. melitensis West Mediterranean	redundant 2016TE6412/1
SRR11450842	B. melitensis West Mediterranean	redundant 2018TE2066/1
SRR11450843	B. melitensis West Mediterranean
SRR11450844	B. melitensis West Mediterranean	cluster ItBM_85
SRR11450845	B. melitensis West Mediterranean
SRR11450846	B. melitensis West Mediterranean	redundant 2016TE10938/1
SRR11450847	B. melitensis West Mediterranean	redundant 2016TE10938/1
SRR11450848	B. melitensis West Mediterranean	redundant 2016TE10938/1
SRR11450849	B. melitensis West Mediterranean	redundant 2018TE10258/1
SRR11450850	B. melitensis West Mediterranean	redundant 2018TE10258/1
SRR11450851	B. melitensis West Mediterranean	redundant 2015TE16825/1
SRR11450852	B. melitensis West Mediterranean	cluster F15/06-7
SRR11450853	B. melitensis West Mediterranean
SRR11450854	B. melitensis West Mediterranean	redundant 2013TE26967/1
SRR11450855	B. melitensis West Mediterranean	cluster ItBM_85
SRR11450856	B. melitensis West Mediterranean	cluster 2018TE2150/1
SRR11450857	B. melitensis West Mediterranean	redundant 2015TE16825/1
SRR11450858	B. melitensis West Mediterranean	pruned 2016TE1406/1
SRR11450859	B. melitensis West Mediterranean	redundant 2015TE16835/1
SRR11450860	B. melitensis West Mediterranean	pruned 2015TE3937/1
SRR11450861	B. melitensis West Mediterranean	pruned ItBM_89
SRR11450862	B. melitensis West Mediterranean	redundant 2015TE16825/1
SRR11450863	B. melitensis West Mediterranean	cluster 2018TE25874/1
SRR11450864	B. melitensis West Mediterranean	pruned 2018TE7507/1
SRR11450865	B. melitensis West Mediterranean	redundant 2013TE26957/1
SRR11450866	B. melitensis West Mediterranean	redundant 2016TE6412/1
SRR11450867	B. melitensis West Mediterranean	cluster ItBM_85
SRR11450868	B. melitensis West Mediterranean	pruned 2015TE20249/2
SRR11450869	B. melitensis West Mediterranean	redundant 2015TE16825/1
SRR11450870	B. melitensis West Mediterranean	cluster ItBM_85
SRR11450871	B. melitensis West Mediterranean	redundant 2015TE16835/1
SRR11450872	B. melitensis West Mediterranean	redundant 2016TE6412/1
SRR11450873	B. melitensis West Mediterranean	pruned ItBM_40
SRR11450874	B. melitensis West Mediterranean	redundant 2013TE29708/1
SRR11450875	B. melitensis West Mediterranean	redundant 2015CB3742/4
SRR11450876	B. melitensis West Mediterranean	redundant 2013TE17316/1
SRR11450877	B. melitensis West Mediterranean	redundant 2015TE6231/2
SRR11456809	B. melitensis West Mediterranean
SRR11456810	B. melitensis West Mediterranean	cluster 2018TE2072/1
SRR11456811	B. melitensis West Mediterranean	redundant 2017TE7017/1
SRR11456812	B. melitensis West Mediterranean	redundant 2018TE2066/1
SRR11456813	B. melitensis West Mediterranean	cluster R3/07-2
SRR11456814	B. melitensis West Mediterranean	cluster ItBM_31
SRR11456815	B. melitensis West Mediterranean	cluster 2018TE7507/1
SRR11456816	B. melitensis West Mediterranean	cluster 2018TE7507/1
SRR11456817	B. melitensis West Mediterranean	pruned 2013TE7096/1
SRR11456818	B. melitensis West Mediterranean
SRR11456819	B. melitensis West Mediterranean	redundant 2017TE7017/1
SRR11456820	B. melitensis West Mediterranean	redundant 2016TE10815/1
SRR11456821	B. melitensis West Mediterranean	cluster ItBM_37
SRR11456822	B. melitensis West Mediterranean	cluster ItBM_37
SRR11456823	B. melitensis West Mediterranean	cluster 2015TE3937/1
SRR11456824	B. melitensis West Mediterranean	cluster 2015TE3937/1
SRR11456825	B. melitensis West Mediterranean	redundant 2016TE6412/1
SRR11456826	B. melitensis West Mediterranean	redundant 2016TE6412/1
SRR11456827	B. melitensis West Mediterranean	cluster 2015TE3937/1
SRR11456828	B. melitensis West Mediterranean	redundant 2016TE17939/1
SRR11456829	B. melitensis West Mediterranean	redundant 2017TE27023/1
SRR11456830	B. melitensis West Mediterranean	pruned 2016TE12367/1
SRR11456831	B. melitensis West Mediterranean	redundant 2016TE10938/1
SRR11456832	B. melitensis West Mediterranean	redundant ItBM_53
SRR11456833	B. melitensis West Mediterranean	redundant ItBM_53
SRR11456834	B. melitensis West Mediterranean	redundant 2015TE16666/1
SRR11456835	B. melitensis West Mediterranean	cluster 2018TE2150/1
SRR11456836	B. melitensis West Mediterranean	redundant 2016TE6409/1
SRR11456837	B. melitensis West Mediterranean	cluster 2016TE6409/1
SRR11456838	B. melitensis West Mediterranean
SRR11456839	B. melitensis West Mediterranean	redundant 2016TE6409/1
SRR11456840	B. melitensis West Mediterranean	redundant 2016TE6409/1
SRR11456841	B. melitensis West Mediterranean	redundant 2016TE6409/1
SRR11456842	B. melitensis West Mediterranean	redundant 2016TE6409/2
SRR11456843	B. melitensis West Mediterranean	redundant 2016TE10815/1
SRR11456844	B. melitensis West Mediterranean	redundant ItBM_82
SRR11456845	B. melitensis West Mediterranean	pruned 2018TE7511/1
SRR11456846	B. melitensis West Mediterranean	redundant ItBM_102
SRR11456847	B. melitensis West Mediterranean
SRR11456848	B. melitensis West Mediterranean	redundant 2017TE13572/1
SRR11456849	B. melitensis West Mediterranean	cluster R3/07-2
SRR11456850	B. melitensis West Mediterranean	pruned 2016TE1495/1
SRR11456851	B. melitensis West Mediterranean	redundant 2016TE25775/1
SRR11456852	B. melitensis West Mediterranean	redundant 2016TE15508/1
SRR11456853	B. melitensis West Mediterranean	redundant 2018TE10258/1
SRR11456854	B. melitensis West Mediterranean	cluster R3/07-2
SRR11456855	B. melitensis West Mediterranean	redundant 2016TE12370/1
SRR11456856	B. melitensis West Mediterranean
SRR11456857	B. melitensis West Mediterranean	redundant 2017TE13576/1
SRR11456858	B. melitensis West Mediterranean	pruned 2016TE1495/1
SRR11456859	B. melitensis West Mediterranean	cluster R3/07-2
SRR11456860	B. melitensis West Mediterranean	cluster R3/07-2
SRR11456861	B. melitensis West Mediterranean
SRR11456862	B. melitensis West Mediterranean	redundant 2016TE6409/1
SRR11456863	B. melitensis West Mediterranean	redundant 2016TE6409/2
SRR11456864	B. melitensis West Mediterranean	pruned BwIM_ITA_55
SRR11456865	B. melitensis West Mediterranean	cluster 2016TE6409/1
SRR11456866	B. melitensis West Mediterranean	redundant 2016TE15508/1
SRR11456867	B. melitensis West Mediterranean	cluster ItBM_37
SRR11456868	B. melitensis West Mediterranean	redundant 2016TE15508/1
SRR11456869	B. melitensis West Mediterranean	redundant 2018TE10258/1
SRR11456870	B. melitensis West Mediterranean	redundant 2018TE10258/1
SRR11456871	B. melitensis West Mediterranean	pruned 2016TE15074/1
SRR11456872	B. melitensis West Mediterranean	redundant 2016TE10938/1
SRR11456873	B. melitensis West Mediterranean	redundant 2016TE10938/1
SRR11456874	B. melitensis West Mediterranean	redundant 2017TE17187/1
SRR11456875	B. melitensis West Mediterranean	redundant 2016TE25775/1
SRR11456876	B. melitensis West Mediterranean	redundant 2017TE27023/1
SRR11456877	B. melitensis West Mediterranean	cluster 2013TE7096/1
SRR11456878	B. melitensis West Mediterranean	cluster 2018TE2150/1
SRR11456879	B. melitensis West Mediterranean
SRR11456880	B. melitensis West Mediterranean	redundant 2017TE7017/1
SRR11456881	B. melitensis West Mediterranean	redundant 2018TE16373/4
SRR11456882	B. melitensis West Mediterranean	redundant 2018TE16373/4
SRR11456883	B. melitensis West Mediterranean	redundant 2017TE7017/1
SRR11456884	B. melitensis West Mediterranean	redundant 2016TE10938/1
SRR11456885	B. melitensis West Mediterranean	redundant 2018TE16373/4
SRR11456886	B. melitensis West Mediterranean	redundant 2018TE16373/4
SRR11456887	B. melitensis West Mediterranean	redundant 2017TE7017/1
SRR11456888	B. melitensis West Mediterranean	cluster R3/07-2
SRR11456889	B. melitensis West Mediterranean	redundant 2017TE17187/1
SRR11456890	B. melitensis West Mediterranean	redundant 2016TE10815/1
SRR11456891	B. melitensis West Mediterranean	cluster 2018TE2150/1
SRR11456892	B. melitensis West Mediterranean
SRR11456893	B. melitensis West Mediterranean	pruned 2018TE7507/1
SRR11456894	B. melitensis West Mediterranean	redundant 2016TE6412/1
SRR11456895	B. melitensis West Mediterranean	redundant 2016TE10938/1
SRR11456896	B. melitensis West Mediterranean	redundant 2016TE10938/1
SRR11456897	B. melitensis West Mediterranean	cluster ItBM_31
SRR11456898	B. melitensis West Mediterranean	redundant 2016TE6412/1
SRR11461884	B. melitensis West Mediterranean	cluster 2018TE7507/1
SRR11461885	B. melitensis West Mediterranean	redundant 2017TE13572/1
SRR11461886	B. melitensis West Mediterranean	redundant 2017TE13570/1
SRR11461887	B. melitensis West Mediterranean	pruned 2018TE7532/1
SRR11461888	B. melitensis West Mediterranean	redundant 2018TE2066/1
SRR11461889	B. melitensis West Mediterranean	cluster 2017TE13572/1
SRR11461890	B. melitensis West Mediterranean
SRR11461891	B. melitensis West Mediterranean	redundant 2017TE13572/1
SRR11461892	B. melitensis West Mediterranean
SRR11461893	B. melitensis West Mediterranean	redundant 2017TE13570/1
SRR11461894	B. melitensis West Mediterranean	redundant 2018TE5118/1
SRR11461895	B. melitensis West Mediterranean
SRR11461896	B. melitensis West Mediterranean	redundant 2018TE7551/1
SRR11461897	B. melitensis West Mediterranean
SRR11461898	B. melitensis West Mediterranean	cluster 2013TE7096/1
SRR11461899	B. melitensis West Mediterranean	redundant 2018TE25874/1
SRR11461900	B. melitensis West Mediterranean	redundant 2017TE13572/1
SRR11461901	B. melitensis West Mediterranean	cluster ItBM_85
SRR11461902	B. melitensis West Mediterranean	redundant 2018TE25874/1
SRR11461903	B. melitensis West Mediterranean	redundant 2018TE25874/1
SRR11461904	B. melitensis West Mediterranean	pruned ItBM_89
SRR11461905	B. melitensis West Mediterranean	redundant 2013TE13490/1
SRR11461906	B. melitensis West Mediterranean	redundant 2018TE25874/1
SRR11461907	B. melitensis West Mediterranean	pruned ItBM_70
SRR11461908	B. melitensis West Mediterranean	redundant 2018TE2150/1
SRR11461909	B. melitensis West Mediterranean
SRR11461910	B. melitensis West Mediterranean
SRR11461911	B. melitensis West Mediterranean	cluster 2018TE7507/1
SRR11461912	B. melitensis West Mediterranean	pruned 2018TE7551/1
SRR11461913	B. melitensis West Mediterranean	cluster R3/07-2
SRR11461914	B. melitensis West Mediterranean	pruned BwIM_ITA_55
SRR11461915	B. melitensis West Mediterranean	cluster R3/07-2
SRR11461916	B. melitensis West Mediterranean	redundant 2018TE16373/4
SRR11461917	B. melitensis West Mediterranean	cluster R3/07-2
SRR11461918	B. melitensis West Mediterranean	cluster R3/07-2
SRR11461919	B. melitensis West Mediterranean	cluster 2018TE2150/1
SRR11461920	B. melitensis West Mediterranean	redundant 2018TE10258/1
SRR11461921	B. melitensis West Mediterranean	redundant 2016TE6412/1
SRR11461922	B. melitensis West Mediterranean	pruned 2017TE13570/1
SRR11461923	B. melitensis West Mediterranean	redundant 2018TE16373/4
SRR11461924	B. melitensis West Mediterranean	redundant ItBM_102
SRR11461925	B. melitensis West Mediterranean	redundant 2018TE10258/1
SRR11461926	B. melitensis West Mediterranean	redundant 2016TE10815/1
SRR11461927	B. melitensis West Mediterranean	cluster 2016TE6409/1
SRR11461928	B. melitensis West Mediterranean
SRR11461929	B. melitensis West Mediterranean	redundant 2017TE13572/1
SRR11461930	B. melitensis West Mediterranean	pruned 2011TE4493/1
SRR11461931	B. melitensis West Mediterranean	pruned 2018TE7507/1
SRR11461932	B. melitensis West Mediterranean	pruned 2018TE7507/1
SRR11461933	B. melitensis West Mediterranean	redundant 2017TE7988/1
SRR11461934	B. melitensis West Mediterranean	cluster 2018TE7507/1
SRR12094789	B. melitensis East Mediterranean
SRR1219642	B. melitensis East Mediterranean					X
SRR12272623	B. melitensis East Mediterranean	duplicate
SRR12272624	B. melitensis West Mediterranean	duplicate
SRR12272625	B. melitensis East Mediterranean	duplicate
SRR12272626	B. melitensis East Mediterranean	duplicate
SRR12272627	B. melitensis West Mediterranean	redundant Bm-877
SRR12272628	B. melitensis West Mediterranean	duplicate
SRR12272629	B. melitensis West Mediterranean	duplicate
SRR12272630	B. melitensis West Mediterranean	duplicate
SRR12272631	B. melitensis East Mediterranean	duplicate
SRR12272632	B. melitensis West Mediterranean	duplicate
SRR12272633	B. melitensis East Mediterranean	pruned 7SNPs GCA_017177535 cover issue
SRR12272634	B. melitensis East Mediterranean	duplicate
SRR12272635	B. melitensis East Mediterranean	duplicate
SRR12272636	B. melitensis East Mediterranean	duplicate
SRR12272637	B. melitensis East Mediterranean	duplicate
SRR12272638	B. melitensis East Mediterranean	duplicate
SRR12272639	B. melitensis East Mediterranean	duplicate
SRR12272640	B. melitensis East Mediterranean	duplicate
SRR12368024	B. melitensis West Mediterranean
SRR12368025	B. melitensis West Mediterranean	redundant 18RB17241
SRR12368026	B. melitensis West Mediterranean	pruned 18RB17241
SRR12368027	B. melitensis West Mediterranean	redundant 18RB17241
SRR12368028	B. melitensis West Mediterranean	redundant 18RB17241
SRR12368029	B. abortus clade C2	cropped 5SNPs SRR12368050
SRR12368030	B. melitensis West Mediterranean	redundant 18RB17241
SRR12368031	B. melitensis West Mediterranean
SRR12368032	B. abortus clade C2	cropped 5SNPs SRR12368050
SRR12368033	B. melitensis West Mediterranean
SRR12368034	B. abortus clade C2	cropped 5SNPs SRR12368050
SRR12368035	B. abortus clade C2	cropped 5SNPs SRR12368050
SRR12368036	B. abortus clade C2	cropped 5SNPs SRR12368050
SRR12368037	B. melitensis West Mediterranean	redundant 18RB17253
SRR12368038	B. melitensis West Mediterranean
SRR12368039	B. melitensis West Mediterranean	redundant 18RB17253
SRR12368040	B. melitensis West Mediterranean	redundant 18RB17241
SRR12368041	B. melitensis West Mediterranean
SRR12368042	B. melitensis West Mediterranean
SRR12368043	B. melitensis West Mediterranean	redundant 18RB17248
SRR12368044	B. melitensis West Mediterranean	pruned 18RB17250
SRR12368045	B. melitensis West Mediterranean	pruned 18RB17250
SRR12368046	B. melitensis West Mediterranean
SRR12368047	B. abortus clade C2	cropped 5SNPs SRR12368050
SRR12368048	B. melitensis West Mediterranean	pruned 18RB17246
SRR12368049	B. abortus clade C2	cropped 5SNPs SRR12368050
SRR12368050	B. abortus clade C2	redundant SRR15047665
SRR12368051	B. melitensis West Mediterranean	redundant 18RB17241
SRR12368052	B. melitensis West Mediterranean	redundant 18RB17241
SRR12420833	B. melitensis East Mediterranean	duplicate
SRR12420834	B. melitensis East Mediterranean	duplicate
SRR12467571	B. melitensis East Mediterranean
SRR13442698	B. melitensis West Mediterranean	duplicate
SRR13495168	B. melitensis West Mediterranean	pruned Bm-877
SRR13495169	B. melitensis West Mediterranean	duplicate
SRR13558868	B. melitensis East Mediterranean	duplicate
SRR13711288	B. melitensis East Mediterranean	redundant SRR12272637
SRR13711289	B. melitensis East Mediterranean	redundant SRR12272634
SRR13711290	B. melitensis East Mediterranean	redundant GCA_017177515
SRR13711291	B. melitensis East Mediterranean	redundant SRR12272637
SRR13711292	B. melitensis East Mediterranean	duplicate
SRR13711293	B. melitensis West Mediterranean	duplicate
SRR13711294	B. melitensis West Mediterranean	duplicate
SRR13711295	B. melitensis West Mediterranean	duplicate
SRR13711296	B. melitensis West Mediterranean	duplicate
SRR1371294	B. abortus clade C2	duplicate
SRR1371295	B. abortus clade C2				X	X
SRR1371296	B. abortus clade C2				X	X
SRR1371297	B. abortus clade C2				X	X
SRR1371298	B. abortus clade C2	duplicate derived from 2308
SRR1371299	B. abortus clade C2	S19 vaccine group
SRR1371300	B. abortus clade C2				X	X
SRR1371301	B. abortus clade C2				X	X
SRR1371302	B. abortus clade C2				X	X
SRR1371303	B. abortus clade C2				X	X
SRR1371304	B. abortus clade C2
SRR1371305	B. abortus clade C2	redundant
SRR1371306	B. abortus clade C2				X	X
SRR1371307	B. abortus clade C2				X	X
SRR1371308	B. abortus clade C2				X	X
SRR1371309	B. abortus clade C2	redundant
SRR1371310	B. abortus clade C2	redundant
SRR1371311	B. abortus clade C2				X	X
SRR1371312	B. abortus clade C2
SRR1371313	B. abortus clade C2	redundant
SRR1371314	B. abortus clade C2	redundant
SRR1371315	B. abortus clade C2
SRR1371316	B. abortus clade C2	redundant
SRR1371317	B. abortus clade C2
SRR1371318	B. abortus clade C2
SRR1371319	B. abortus clade C2
SRR1371320	B. abortus clade C2
SRR1371321	B. abortus clade C2	redundant
SRR1371322	B. abortus clade C2	redundant B12-0583
SRR1371323	B. abortus clade C2	redundant
SRR1371324	B. abortus clade C2
SRR1371325	B. abortus clade C2	redundant
SRR1371326	B. abortus clade C2
SRR1371327	B. abortus clade C2				X	X
SRR1371328	B. abortus clade C2
SRR1371329	B. abortus clade C2
SRR1371330	B. abortus clade C2
SRR1371331	B. abortus clade C2	redundant
SRR1371332	B. abortus clade C2
SRR1371333	B. abortus clade C2	redundant
SRR1371334	B. abortus clade C2
SRR1371335	B. abortus clade C2
SRR1371336	B. abortus clade C2	redundant
SRR1371337	B. abortus clade C2	redundant
SRR1371338	B. abortus clade C2	redundant
SRR1371339	B. abortus clade C2
SRR1371340	B. abortus clade C2
SRR1371341	B. abortus clade C2	redundant
SRR1371342	B. abortus clade C2	redundant
SRR1371343	B. abortus clade C2
SRR1371344	B. abortus clade C2	redundant
SRR1371345	B. abortus clade C2	redundant
SRR1371346	B. abortus clade C2	redundant
SRR1371347	B. abortus clade C2	redundant
SRR1371348	B. abortus clade C2	redundant
SRR1371349	B. abortus clade C2	redundant
SRR1371350	B. abortus clade C2
SRR1371351	B. abortus clade C2	redundant
SRR1371352	B. abortus clade C2
SRR1371353	B. abortus clade C2	redundant
SRR1371354	B. abortus clade C2	redundant
SRR1371355	B. abortus clade C2	redundant
SRR1371356	B. abortus clade C2	redundant
SRR1371357	B. abortus clade C2
SRR1371358	B. abortus clade C2
SRR1371359	B. abortus clade C2	redundant
SRR1371360	B. abortus clade C2
SRR1371362	B. abortus clade C2	duplicate derived from 2308
SRR1371363	B. abortus clade C2	duplicate derived from 2308
SRR1371364	B. abortus clade C2	redundant
SRR1371365	B. abortus clade C2
SRR1371366	B. abortus clade C2				X	X
SRR1371367	B. abortus clade C2
SRR1371368	B. abortus clade C2				X	X
SRR1371369	B. abortus clade C2
SRR1371370	B. abortus clade C2				X	X
SRR1371371	B. abortus clade C2				X	X
SRR1371372	B. abortus clade C2				X	X
SRR1371373	B. abortus clade C2				X	X
SRR1371374	B. abortus clade C2				X	X
SRR1371375	B. abortus clade C2				X	X
SRR1371376	B. abortus clade C2
SRR1371377	B. abortus clade C2				X	X
SRR1371378	B. abortus clade C2				X	X
SRR1371379	B. abortus clade C2	duplicate
SRR1371380	B. abortus clade C2
SRR1371381	B. abortus clade C2				X	X
SRR1371382	B. abortus clade C2				X	X
SRR1371383	B. abortus clade C2				X	X
SRR1371384	B. abortus clade C2				X	X
SRR1371385	B. abortus clade C2				X	X
SRR1371386	B. abortus clade C2	redundant
SRR1371387	B. abortus clade C2				X	X
SRR1371388	B. abortus clade C2				X	X
SRR138272	B. melitensis West Mediterranean	duplicate
SRR15047626	B. abortus clade C2	2308 derived
SRR15047627	B. abortus clade C2	2308 derived
SRR15047628	B. abortus clade C2	redundant SRR15047665
SRR15047629	B. abortus clade C2	redundant SRR15047665
SRR15047630	B. abortus clade C2	redundant SRR15047665
SRR15047631	B. abortus clade C2	pruned 1SNP SRR15047665
SRR15047633	B. abortus clade C2	redundant SRR15047665
SRR15047634	B. abortus clade C2	2308 derived
SRR15047637	B. abortus clade C2	pruned 1SNP SRR15047665
SRR15047638	B. abortus clade C2	redundant SRR15047665
SRR15047639	B. abortus clade C2	2308 derived
SRR15047640	B. abortus clade C2	redundant SRR15047665
SRR15047641	B. abortus clade C2	2308 derived
SRR15047642	B. abortus clade C2	redundant SRR15047665
SRR15047645	B. abortus clade C2	2308 derived
SRR15047648	B. abortus clade C2	redundant SRR15047655
SRR15047649	B. abortus clade C2	pruned 1SNP SRR15047655
SRR15047650	B. abortus clade C2	pruned 1SNP SRR15047655
SRR15047651	B. abortus clade C2	redundant SRR15047665
SRR15047652	B. abortus clade C2	pruned 4SNP SRR15047655
SRR15047653	B. abortus clade C2	pruned 6SNP SRR15047655
SRR15047654	B. abortus clade C2	pruned 1SNP SRR15047655
SRR15047655	B. abortus clade C2	pruned 5SNPs SRR15047665
SRR15047656	B. abortus clade C2				X	X
SRR15047657	B. abortus clade C2	redundant SRR15047659
SRR15047658	B. abortus clade C2	pruned 1SNP SRR15047656
SRR15047659	B. abortus clade C2	pruned 1SNP SRR15047656
SRR15047660	B. abortus clade C2	redundant SRR15047656
SRR15047661	B. abortus clade C2	redundant SRR15047656
SRR15047662	B. abortus clade C2	redundant SRR15047665
SRR15047663	B. abortus clade C2	redundant SRR15047664
SRR15047664	B. abortus clade C2	pruned 2SNP SRR15047665
SRR15047665	B. abortus clade C2				X	X
SRR15047666	B. abortus clade C2	pruned 2SNP SRR15047665
SRR15047667	B. abortus clade C2	pruned 3SNPs SRR1371296
SRR15047668	B. abortus clade C2	2308 derived
SRR15047669	B. abortus clade C2	redundant SRR15047665
SRR15047670	B. abortus clade C2	pruned 1SNP SRR15047655
SRR15047671	B. abortus clade C2	redundant SRR15047655
SRR15047672	B. abortus clade C2	redundant SRR15047655
SRR15047673	B. abortus clade C2	redundant SRR15047665
SRR15047674	B. abortus clade C2	2308 derived
SRR15413244	B. melitensis African
SRR17954430	B. abortus clade C2	2308 derived
SRR18046050	B. melitensis East Mediterranean	poor cover
SRR18097089	B. abortus clade C2	poor cover
SRR18097090	B. abortus clade C2	poor cover
SRR18097091	B. abortus clade C2	redundant GCA_022426845
SRR18097092	B. abortus clade C2	pruned 1SNP GCA_022426895
SRR18097093	B. abortus clade C2	redundant GCA_022426895
SRR1925727	B. melitensis West Mediterranean					X
SRR2103845	B. melitensis Americas	duplicate
SRR21389275	B. melitensis East Mediterranean
SRR2182213	B. abortus clade C2				X	X
SRR2863419	B. melitensis East Mediterranean	duplicate
SRR2873753	B. melitensis West Mediterranean	duplicate
SRR2874381	B. melitensis Americas	duplicate
SRR2874384	B. melitensis Americas	duplicate
SRR2875428	B. melitensis East Mediterranean	duplicate
SRR3096322	B. abortus clade C2
SRR3096323	B. abortus clade C2
SRR3096324	B. abortus clade C2
SRR3096325	B. abortus clade C2
SRR3096326	B. abortus clade C2
SRR3096327	B. abortus clade C2	redundant B01-0206
SRR3096328	B. abortus clade C2	redundant
SRR3096329	B. abortus clade C2
SRR3096330	B. abortus clade C2
SRR3096331	B. abortus clade C2
SRR3096332	B. abortus clade C2
SRR3096333	B. abortus clade C2
SRR3096334	B. abortus clade C2	redundant
SRR3096335	B. abortus clade C2	redundant
SRR3096336	B. abortus clade C2	redundant
SRR3096337	B. abortus clade C2	redundant
SRR3096338	B. abortus clade C2	redundant
SRR3096339	B. abortus clade C2	redundant
SRR3096340	B. abortus clade C2
SRR3096341	B. abortus clade C2	redundant
SRR3096342	B. abortus clade C2	redundant, potentially derived from 2308
SRR3096343	B. abortus clade C2	redundant
SRR3096344	B. abortus clade C2
SRR3096345	B. abortus clade C2
SRR3096346	B. abortus clade C2	redundant B01-0638
SRR3096347	B. abortus clade C2
SRR3096348	B. abortus clade C2	redundant
SRR3096349	B. abortus clade C2	redundant
SRR3096350	B. abortus clade C2
SRR3096351	B. abortus clade C2				X	X
SRR3096352	B. abortus clade C2
SRR3096353	B. abortus clade C2
SRR3096354	B. abortus clade C2
SRR3096355	B. abortus clade C2
SRR3096356	B. abortus clade C2	redundant
SRR3096357	B. abortus clade C2
SRR3096358	B. abortus clade C2
SRR3096359	B. abortus clade C2
SRR3096360	B. abortus clade C2
SRR3096361	B. abortus clade C2
SRR3096362	B. abortus clade C2
SRR3096363	B. abortus clade C2
SRR3096364	B. abortus clade C2
SRR3096365	B. abortus clade C2	redundant
SRR3096366	B. abortus clade C2				X	X
SRR3096367	B. abortus clade C2
SRR3096368	B. abortus clade C2
SRR3096369	B. abortus clade C2
SRR3096370	B. abortus clade C2
SRR3096371	B. abortus clade C2	redundant
SRR3096372	B. abortus clade C2	redundant
SRR3096373	B. abortus clade C2	redundant
SRR3096374	B. abortus clade C2
SRR3096375	B. abortus clade C2
SRR3096376	B. abortus clade C2	redundant
SRR3096377	B. abortus clade C2	redundant
SRR3096378	B. abortus clade C2
SRR3096379	B. abortus clade C2				X	X
SRR3096380	B. abortus clade C2
SRR3096381	B. abortus clade C2	redundant
SRR3096382	B. abortus clade C2
SRR3096383	B. abortus clade C2
SRR3096384	B. abortus clade C2
SRR3096385	B. abortus clade C2
SRR3096386	B. abortus clade C2	redundant
SRR3096387	B. abortus clade C2	redundant
SRR3096388	B. abortus clade C2	redundant
SRR3096389	B. abortus clade C2	duplicate
SRR3096390	B. abortus clade C2
SRR3096391	B. abortus clade C2	redundant
SRR3096392	B. abortus clade C2
SRR3096393	B. abortus clade C2
SRR3096394	B. abortus clade C2
SRR3096395	B. abortus clade C2
SRR3096396	B. abortus clade C2
SRR3096397	B. abortus clade C2	redundant
SRR3096398	B. abortus clade C2	redundant
SRR3096399	B. abortus clade C2
SRR3096400	B. abortus clade C2
SRR3096401	B. abortus clade C2				X	X
SRR3096402	B. abortus clade C2				X	X
SRR3096403	B. abortus clade C2				X	X
SRR3096404	B. abortus clade C2
SRR3096405	B. abortus clade C2	redundant
SRR3096406	B. abortus clade C2	redundant
SRR3096407	B. abortus clade C2				X	X
SRR3096408	B. abortus clade C2	redundant
SRR3096409	B. abortus clade C2				X	X
SRR3096411	B. abortus clade C2				X	X
SRR3096412	B. abortus clade C2
SRR3096413	B. abortus clade C2
SRR3096414	B. abortus clade C2
SRR3096415	B. abortus clade C2
SRR3096416	B. abortus clade C2	redundant
SRR3096417	B. abortus clade C2	redundant
SRR3096418	B. abortus clade C2
SRR3096419	B. abortus clade C2
SRR3096420	B. abortus clade C2
SRR3096421	B. abortus clade C2				X	X
SRR3096422	B. abortus clade C2
SRR3096423	B. abortus clade C2
SRR3096425	B. abortus clade C2				X	X
SRR3096426	B. abortus clade C2
SRR3096427	B. abortus clade C2	redundant
SRR3096428	B. abortus clade C2
SRR3096429	B. abortus clade C2
SRR3096430	B. abortus clade C2	redundant
SRR3096431	B. abortus clade C2
SRR3096432	B. abortus clade C2	redundant B11-0252
SRR3096433	B. abortus clade C2
SRR3096434	B. abortus clade C2
SRR3096435	B. abortus clade C2	redundant
SRR3096436	B. abortus clade C2	redundant
SRR3096437	B. abortus clade C2	redundant
SRR3096438	B. abortus clade C2	redundant
SRR3096439	B. abortus clade C2
SRR3096440	B. abortus clade C2
SRR3096441	B. abortus clade C2
SRR3096442	B. abortus clade C2
SRR3096443	B. abortus clade C2	redundant
SRR3096444	B. abortus clade C2	redundant
SRR3096445	B. abortus clade C2
SRR3096446	B. abortus clade C2
SRR3096447	B. abortus clade C2
SRR3096448	B. abortus clade C2
SRR3096449	B. abortus clade C2
SRR3096450	B. abortus clade C2
SRR3096451	B. abortus clade C2	redundant
SRR3096452	B. abortus clade C2
SRR3096453	B. abortus clade C2	redundant
SRR3096454	B. abortus clade C2	redundant B11-0616
SRR3096455	B. abortus clade C2
SRR3096456	B. abortus clade C2
SRR3096457	B. abortus clade C2	redundant B12-0332
SRR3096458	B. abortus clade C2	redundant
SRR3096459	B. abortus clade C2	redundant
SRR3096460	B. abortus clade C2				X	X
SRR3096461	B. abortus clade C2	redundant
SRR3096462	B. abortus clade C2	redundant B12-0570
SRR3096463	B. abortus clade C2
SRR3096464	B. abortus clade C2	redundant
SRR3096465	B. abortus clade C2				X	X
SRR3096466	B. abortus clade C2
SRR3096467	B. abortus clade C2				X	X
SRR3096468	B. abortus clade C2
SRR3096469	B. abortus clade C2				X	X
SRR3096470	B. abortus clade C2				X	X
SRR3096471	B. abortus clade C2	redundant
SRR3096472	B. abortus clade C2	redundant
SRR3096473	B. abortus clade C2				X	X
SRR3096474	B. abortus clade C2	redundant
SRR3096475	B. abortus clade C2
SRR3096476	B. abortus clade C2
SRR3096477	B. abortus clade C2	redundant
SRR3096478	B. abortus clade C2
SRR3096479	B. abortus clade C2				X	X
SRR3096480	B. abortus clade C2
SRR3096481	B. abortus clade C2				X	X
SRR3096482	B. abortus clade C2				X	X
SRR3096483	B. abortus clade C2
SRR3096484	B. abortus clade C2	redundant
SRR3096485	B. abortus clade C2
SRR3096486	B. abortus clade C2
SRR3096487	B. abortus clade C2	redundant
SRR3096488	B. abortus clade C2
SRR3096489	B. abortus clade C2	redundant
SRR3096490	B. abortus clade C2
SRR3096491	B. abortus clade C2
SRR3096492	B. abortus clade C2	redundant
SRR3096493	B. abortus clade C2	redundant
SRR3096494	B. abortus clade C2	redundant
SRR3096495	B. abortus clade C2	redundant
SRR3096496	B. abortus clade C2	redundant B12-0583
SRR3096497	B. abortus clade C2
SRR3096498	B. abortus clade C2	redundant
SRR3096499	B. abortus clade C2	redundant
SRR3096500	B. abortus clade C2	redundant
SRR3096501	B. abortus clade C2	redundant
SRR3096502	B. abortus clade C2	redundant
SRR3096503	B. abortus clade C2
SRR3096504	B. abortus clade C2
SRR3096505	B. abortus clade C2	duplicate
SRR3096506	B. abortus clade C2	duplicate
SRR3096507	B. abortus clade C2				X	X
SRR3096508	B. abortus clade C2
SRR3096509	B. abortus clade C2
SRR3096510	B. abortus clade C2
SRR3102737	B. abortus clade C2
SRR3106339	B. melitensis West Mediterranean
SRR3106340	B. melitensis West Mediterranean
SRR314676	B. melitensis East Mediterranean	duplicate
SRR314677	B. abortus clade C2	redundant
SRR314678	B. abortus clade C2	duplicate
SRR314679	B. abortus clade C2
SRR314680	B. abortus clade C2	poor cover duplicate
SRR314682	B. abortus clade C2	duplicate
SRR314685	B. abortus clade C2	redundant
[truncated: 556 more rows]
